# Supplementary material for: Three decades of global methane sources and sinks
Source: Springer Nature journal article supplement (doi:10.1038/ngeo1955), 2013-09-20
Supplement: 41561_2013_BFngeo1955_MOESM198_ESM.pdf [file 41561_2013_BFngeo1955_MOESM198_ESM.pdf]

# Three decades of global methane sources and sinks

3 Stefanie Kirschke<sup>1</sup>, Philippe Bousquet<sup>1</sup>, Philippe Ciais<sup>1</sup>, Marielle Saunois<sup>1</sup>, Josep G. Canadell<sup>2</sup>,  
4 Edward J. Dlugokencky<sup>3</sup>, Peter Bergamaschi<sup>4</sup>, Daniel Bergmann<sup>5</sup>, Donald R. Blake<sup>6</sup>, Lori Bruhwiler<sup>3</sup>,  
5 Philip Cameron-Smith<sup>5</sup>, Simona Castaldi<sup>7,8</sup>, Frédéric Chevallier<sup>1</sup>, Liang Feng<sup>9</sup>, Annemarie Fraser<sup>9</sup>,  
6 Paul J. Fraser<sup>15</sup>, Martin Heimann<sup>10</sup>, Elke L. Hodson<sup>11</sup>, Sander Houweling<sup>12,13</sup>, Béatrice Josse<sup>14</sup>, Paul B.  
7 Krummel<sup>15</sup>, Jean-François Lamarque<sup>16</sup>, Ray L. Langenfelds<sup>15</sup>, Corinne Le Quéré<sup>17</sup>, Vaishali Naik<sup>18</sup>,  
8 Simon O'Doherty<sup>19</sup>, Paul I. Palmer<sup>9</sup>, Isabelle Pison<sup>1</sup>, David Plummer<sup>20</sup>, Benjamin Poulter<sup>1</sup>, Ronald G.  
9 Prinn<sup>21</sup>, Matt Rigby<sup>22</sup>, Bruno Ringeval<sup>13,23,24</sup>, Monia Santini<sup>8</sup>, Martina Schmidt<sup>1</sup>, Drew T. Shindell<sup>25</sup>,  
10 Isobel J. Simpson<sup>6</sup>, Renato Spahni<sup>26</sup>, L. Paul Steele<sup>15</sup>, Sarah A. Strode<sup>27,28</sup>, Kengo Sudo<sup>29</sup>, Sophie  
11 Szopa<sup>1</sup>, Guido R. van der Werf<sup>30</sup>, Apostolos Voulgarakis<sup>25,31</sup>, Michiel van Weele<sup>32</sup>, Ray F. Weiss<sup>33</sup>,  
12 Jason E. Williams<sup>32</sup>, Guang Zeng<sup>34</sup>

13

14 <sup>1</sup>LSCE-CEA-UVSQ-CNRS France, <sup>2</sup>Global Carbon Project, CSIRO Marine and Atmospheric  
15 Research, Australia, <sup>3</sup>NOAA ESRL, USA <sup>3</sup>Institute for Environment and Sustainability, <sup>4</sup>Joint  
16 Research Centre, Italy, <sup>5</sup>Lawrence Livermore National Laboratory, USA, <sup>6</sup>University of California  
17 Irvine, USA, <sup>7</sup>Department of Environmental Sciences, Second University of Naples, Italy, <sup>8</sup>Centro  
18 euro-Mediterraneo per i Cambiamenti Climatici CMCC, Lecce, Italy, <sup>9</sup>School of Geosciences,  
19 University of Edinburgh, UK, <sup>10</sup>MPI Biogeochemistry, Germany, <sup>11</sup>Swiss Federal Research Institute  
20 WSL, Switzerland, <sup>12</sup>SRON, Netherlands institute for space research, The Netherlands, <sup>13</sup>Institute for  
21 Marine and Atmospheric research Utrecht, The Netherlands, <sup>14</sup>Météo France, France, <sup>15</sup>Centre for  
22 Australian Weather and Climate Research/CSIRO Marine and Atmospheric Research, Aspendale,  
23 Victoria, Australia, <sup>16</sup>NCAR, USA, <sup>17</sup>Tyndall Centre for Climate Change Research, UK,  
24 <sup>18</sup>UCAR/GFDL, USA, <sup>19</sup>University of Bristol, UK, <sup>20</sup>CCCma, Environment Canada, <sup>21</sup>Massachusetts  
25 Institute of Technology, USA, <sup>22</sup>School of Chemistry, University of Bristol, Bristol, UK, <sup>23</sup>IMAU,

26 Utrecht University, The Netherlands, <sup>24</sup>Department of Systems Ecology, VU University Amsterdam,  
27 The Netherlands, <sup>25</sup>NASA GISS, USA, <sup>26</sup>University of Bern, Switzerland, <sup>27</sup>NASA GSFC, USA,  
28 <sup>28</sup>Universities Space Research Association, USA, <sup>29</sup>Graduate School of Environmental Studies,  
29 Nagoya University Furo-cho, Japan, <sup>30</sup>VU University, The Netherlands, <sup>31</sup>Department of Physics,  
30 Imperial College, London, UK, <sup>32</sup>Royal Netherlands Meteorological Institute (KNMI), The  
31 Netherlands, <sup>33</sup>Scripps Institution of Oceanography, USA <sup>34</sup>National Institute of Water and  
32 Atmospheric Research, New Zealand.

33 *Corresponding author: Philippe Bousquet, philippe.bousquet@lsce.ipsl.fr*

34

|    |                                                                                                        |           |
|----|--------------------------------------------------------------------------------------------------------|-----------|
| 35 | <b>I Supporting text, figures, and tables.....</b>                                                     | <b>5</b>  |
| 36 | <b>I.1 Supporting text .....</b>                                                                       | <b>5</b>  |
| 37 | ST1 - Atmospheric CH <sub>4</sub> observations and growth rates for the different atmospheric networks |           |
| 38 | (Figure 1).....                                                                                        | 5         |
| 39 | ST2 - Regional and latitudinal distributions of wetland and biomass burning emissions (Figure          |           |
| 40 | S0 and S1).....                                                                                        | 6         |
| 41 | ST3 - Time series of CH <sub>4</sub> emissions from natural wetlands and biomass-burning for northern  |           |
| 42 | regions and tropical regions (Figures S2 and S3).....                                                  | 7         |
| 43 | ST4 - Latitudinal distribution of the IAV of emissions and sinks (Figure S4).....                      | 8         |
| 44 | ST5 - Year-to-year variations of emissions (Figure S5).....                                            | 9         |
| 45 | ST6 – IAV variations of sinks .....                                                                    | 10        |
| 46 | ST7 - A simple model for CH <sub>4</sub> emissions from termites (Figure S6).....                      | 12        |
| 47 | ST8 - The “plant” source .....                                                                         | 13        |
| 48 | <b>I.2 Supporting figures.....</b>                                                                     | <b>14</b> |
| 49 | <b>I.3 Supporting tables.....</b>                                                                      | <b>21</b> |
| 50 | <b>II Observations and model descriptions.....</b>                                                     | <b>30</b> |
| 51 | <b>II.1 Description of atmospheric CH<sub>4</sub> datasets .....</b>                                   | <b>30</b> |
| 52 | NOAA/ESRL (Dlugokencky et al., 2011).....                                                              | 30        |
| 53 | AGAGE (Rigby et al., 2008).....                                                                        | 30        |
| 54 | CSIRO (Francey et al., 1999).....                                                                      | 31        |
| 55 | UCI (Simpson et al., 2012).....                                                                        | 33        |
| 56 | <b>II.2 Description of top-down inversions (T-D) .....</b>                                             | <b>34</b> |
| 57 | TM5-4DVAR (Bergamaschi et al., 2009).....                                                              | 34        |
| 58 | LMDZ-MIOP (Bousquet et al., 2011).....                                                                 | 35        |
| 59 | CarbonTracker-CH <sub>4</sub> (Bruhwiler et al., 2012).....                                            | 35        |
| 60 | GEOS-Chem (Fraser et al., 2013).....                                                                   | 36        |
| 61 | TM5-4DVAR (Beck et al., 2012).....                                                                     | 37        |
| 62 | LMDZt-SACS (Pison et al., 2009; Bousquet et al., 2011).....                                            | 37        |
| 63 | MATCH model (Chen & Prinn, 2006).....                                                                  | 38        |
| 64 | TM2 model (Hein et al., 1997).....                                                                     | 39        |
| 65 | GISS model (Fung et al. 1991).....                                                                     | 39        |
| 66 | <b>II.3 Description of bottom-up studies (B-U) .....</b>                                               | <b>39</b> |
| 67 | LPJ-wsl (Hodson et al, 2011).....                                                                      | 39        |
| 68 | ORCHIDEE (Ringeval et al., 2011).....                                                                  | 40        |
| 69 | LPJ-WhyMe (Spahni et al., 2011).....                                                                   | 41        |
| 70 | GICC (Mieville et al., 2010).....                                                                      | 41        |
| 71 | RETRO (Schultz et al., 2007).....                                                                      | 41        |
| 72 | GFEDv2 (Van der Werf et al., 2004).....                                                                | 42        |
| 73 | GFEDv3 (Van der Werf et al., 2010).....                                                                | 42        |
| 74 | FINNv1 (Wiedinmyer et al., 2011).....                                                                  | 42        |
| 75 | IIASA (Dentener et al., 2005).....                                                                     | 42        |
| 76 | EPA, 2011.....                                                                                         | 42        |
| 77 | EDGARv4.1 (EDGAR4.1, 2009).....                                                                        | 42        |
| 78 | EDGARv4.2 (EDGAR4.2, 2011).....                                                                        | 43        |
| 79 | Description of models contributing to the Atmospheric Chemistry and Climate Model                      |           |
| 80 | Intercomparison Project (ACCMIP, Lamarque et al., 2013; Voulgarakis et al., 2013; Naik et al.,         |           |
| 81 | 2013).....                                                                                             | 43        |
| 82 | TM5 full chemistry model (Williams et al., 2012; Huijnen et al., 2010).....                            | 44        |

83 **III References** ..... 45  
84

## 85 **I Supporting text, figures, and tables**

### 86 **I.1 Supporting text**

#### 87 **ST1 - Atmospheric CH<sub>4</sub> observations and growth rates for the different** 88 **atmospheric networks (Figure 1).**

89 Several types of measurements exist for atmospheric methane. High precision measurements ( $\pm 3$  ppb),  
90 traceable to the World Meteorological Organisation (WMO) mole fraction international calibration  
91 scale, are available from 160 fixed surface stations<sup>1-4</sup> and more than 30 mobile stations (ships and  
92 aircraft)<sup>5,6,7</sup>. Atmospheric observations consist of both flask samples (grab samples, weekly or bi-  
93 weekly) and continuous data (hourly or better resolution). Precise measurements of total column CH<sub>4</sub>  
94 mixing ratio (XCH<sub>4</sub>) are provided from the Total Column Carbon Observing Network (TCCON) of 25  
95 ground based remote-sensing stations which are only indirectly linked to the WMO scale<sup>8,9</sup>. Isotopic  
96 measurements (<sup>13</sup>C-CH<sub>4</sub> and deuterium-methane, CH<sub>3</sub>D) are performed at a subset of surface stations  
97 and help separate biogenic from other CH<sub>4</sub> sources<sup>10-15</sup>. Measurements of <sup>14</sup>C-CH<sub>4</sub> at one station help  
98 quantify the contribution of fossil CH<sub>4</sub> to the total source mix<sup>16</sup>. Finally, space-borne XCH<sub>4</sub> retrievals  
99 (over the last decade only) predominantly originate from three satellites<sup>17-21</sup> providing global coverage  
100 albeit with much lower precision (e.g. random error of  $\sim 30$  ppb for SCIAMACHY<sup>22</sup> and latitudinal  
101 biases of up to 40 ppb<sup>23</sup>).

102 Figure 1 of the paper plots the atmospheric globally averaged CH<sub>4</sub> mole fractions and the associated  
103 growth rates for the four global trace gas atmospheric monitoring networks with a global coverage  
104 NOAA/ESRL<sup>24</sup>, AGAGE<sup>25</sup>, CSIRO<sup>26</sup> and UCI<sup>27</sup>. For NOAA/ESRL, AGAGE AND CSIRO. The  
105 growth rates have been calculated as the derivative of a trend curve computed according to Thoning et  
106 al., (1989)<sup>28</sup>. The growth rate calculations for the UCI network are described further below. Decadal  
107 global means of CH<sub>4</sub> mole fractions for the 1990s (1746 ppb) and the 2000s (1776 ppb) are  
108 remarkably consistent between the four networks, with respective ranges of [1743-1747 ppb] and  
109 [1775-1779 ppb]. Differences on the decadal means are mostly due to representativeness and sampling

110 differences between networks, and to a lesser extent to instrumental errors. Indeed, regular inter-  
111 comparison between networks at various sites shows differences smaller than  $\pm 2$  ppb. The decadal  
112 mean for the 1980s is more uncertain [1663-1690 ppb], possibly because of a more limited spatial and  
113 temporal coverage of some of the networks at that time. Growth rates are also very similar in the  
114 1980s [11.3-12.3 ppb.yr<sup>-1</sup>], the 1990s [4.9-6.5 ppb.yr<sup>-1</sup>] and the 2000s [2.3-3.6 ppb.yr<sup>-1</sup>] with mean  
115 values of  $12 \pm 6$  ppb.yr<sup>-1</sup>,  $6 \pm 8$  ppb.yr<sup>-1</sup>,  $2 \pm 3$  ppb.yr<sup>-1</sup>, respectively. The associated uncertainty represents  
116 the 1-sigma variation from one year to another (inter-annual variability). The difference in the decadal  
117 growth rates between the four networks is less than 1 ppb.yr<sup>-1</sup>.

## 118 **ST2 - Regional and latitudinal distributions of wetland and biomass burning** 119 **emissions (Figure S0 and S1)**

120 Using the different top-down and bottom-up models and inventories gathered in this work, we  
121 computed averaged maps (Fig. S0) and zonally averaged emission fluxes of CH<sub>4</sub> from natural  
122 wetlands (Fig. S0 & S1, top), and biomass-burning (Fig. S0 & S1, bottom). To calculate the mean  
123 emissions we used the following time periods: 1990-2006 for wetland emissions and 1980-2006 for  
124 biomass burning emissions. As a result, the FINN inventory is not included in Fig S0 and S1.  
125 Averaged spatial pattern present common zones of emissions (stippled points on the right panels of  
126 Fig. S0):  $66 \pm 9\%$  for wetland emissions and  $38 \pm 9\%$  for biomass burning emissions. In Fig. S1, the  
127 bottom-up zonal means are presented as coloured solid lines whereas for top-down, only the range  
128 (min-max) is shown with the coloured areas. Wetland emissions are mainly located in the Tropics and  
129 in the high latitudes. ORCHIDEE's estimates are higher and with more spatial variations than those of  
130 LPJ except below 30°S. In the Tropics, LPJ's estimates by 1° band of latitude are around 10-20 Tg/yr,  
131 generally below ORCHIDEE's estimates. In the mid and high latitudes, the B-U models show a larger  
132 spread. In particular, the ORCHIDEE-P07 estimate is much higher than any other estimate (including  
133 ORCHIDEE-TOP) around 45°N and north of 60°N. LPJ-wsl follows ORCHIDEE-P07, but only up to  
134 57°N. This shows that the wetland emission estimate is highly sensitive to the wetland extent, which  
135 remains a challenge for modellers. The top-down estimates are generally in the lower range of the

136 bottom-up values, except around 30°S. Regarding the top-down range, the minimum is mainly due to  
137 the estimates from GEOS-Chem while the Carbon-Tracker-CH<sub>4</sub> model retrieves the highest estimates,  
138 except north of 60°N where LMDZt-SACS is the highest. The biomass burning emissions, including  
139 biofuel, occur essentially in the Tropics where the highest fluxes are found along with a great spread  
140 between the models. Note the different scale compared to the wetland emissions. For biomass burning  
141 emissions, the ranges of estimates from top-down are similar to the bottom-up estimates. The model  
142 LMDZ-MIOP produces the maximum observed in the Tropics. The lowest estimates come from the  
143 GEOS-Chem model. The other top-down models lie in-between. In the mid latitudes, CH<sub>4</sub> emissions  
144 from biomass burning and biofuel essentially originate from biofuel burning.

### 145 **ST3 - Time series of CH<sub>4</sub> emissions from natural wetlands and biomass-burning** 146 **for northern regions and tropical regions (Figures S2 and S3)**

147 Deseasonalized time series (12 month running means) for CH<sub>4</sub> emissions from natural wetlands (top,  
148 in green) and biomass burning (bottom in red) are plotted in Fig. S2, for both the Tropics (<30°N, left)  
149 and the northern high latitudes (50-90° N, right). Lines represent the different bottom-up models.  
150 Coloured ranges represent the top-down inversions. Fig. S3 is the same as Fig. S2 for natural wetlands,  
151 but plots the anomaly computed as the deseasonalized time series minus the long-term mean of each  
152 time series. Fig. S2 illustrates the large uncertainties remaining in the estimation of the long-term  
153 mean emissions from natural wetlands and biomass burning in the Tropics. It also shows that a large  
154 climate event, such as the 1997-98 El Niño, can have a very different impact on biomass burning  
155 among models. Fig. S3 shows that the IAV of CH<sub>4</sub> emissions from natural wetlands is more robustly  
156 estimated than the long-term mean. There is a better agreement on the phasing of year-to-year changes  
157 among studies than on their magnitude. Most approaches show an increasing long-term trend for CH<sub>4</sub>  
158 emissions from natural wetlands since the mid 1990s.

#### 159 **ST4 - Latitudinal distribution of the IAV of emissions and sinks (Figure S4)**

160 Figure S4 shows the latitudinal distribution of the inter-annual variability of emissions and sinks. For  
161 both the emissions and the sinks, we calculated the 12-month running means of monthly zonal mean  
162 for band of 1 degree of latitude. For the emissions, in order to avoid interpreting long-term changes  
163 and focus on year-to-year changes, we subtracted a linear trend from the deseasonalized zonal means.  
164 The inter-annual variability was then defined as the standard deviation of the de-trended time series of  
165 the deseasonalized zonal means over the period 1995-2005. This calculation was possible for all  
166 approaches except those providing only yearly data.

167 For the CH<sub>4</sub> loss, we applied a slightly different calculation in order to allow comparison to the IAV  
168 estimates performed in Montzka et al. (2011)<sup>29</sup>. Instead of expressing the anomaly as the standard  
169 deviation of the deseasonalized zonal mean, we defined the IAV as the difference between monthly  
170 deseasonalized zonal mean and long-term mean. This calculation enhances the estimated IAV by 0.1-  
171 0.4%.

172 Over the three decades, natural wetland variability dominates the year-to-year changes in emissions  
173 with a tropical maximum spread between 30°S and 30°N, and a secondary maximum at northern  
174 latitudes around 50°N (Fig. S4-a). The magnitude of the year-to-year variability of other emissions is  
175 4-8 times smaller than for natural wetlands (Fig. S4-b-d), except for biomass burning due to the 1997-  
176 98 El Niño (Fig. S4-b). Fossil fuel IAV dominates at mid latitudes of the northern hemisphere (fig. S4  
177 c) and produces a secondary peak in the zonal average of CH<sub>4</sub> emission IAV at 30°S. Both regions are  
178 home to most of the developed countries (northern hemisphere, mid-latitudes) and some rapidly  
179 developing tropical countries in Southeast Asia, South America, Central Africa, and Oceania. The  
180 bottom-up inventories produce a third intriguing peak of fossil CH<sub>4</sub> emission IAV in the high northern  
181 latitudes, not consistent with the observation-driven top-down inversions. IAV of agriculture/waste  
182 emissions (Fig. S4-d) from top-down is largest between 10°N and 40°N where most of the rice  
183 agriculture and waste production from animal husbandry in China, India and South-East Asia are



184 located. OH IAV is largest in the Tropics (Fig. S4-e,f) where most of the OH is produced. Top-down  
185 inversions are more in agreement in the 2000s than in the 1990s with bottom-up models as explained  
186 in the main text.

### 187 **ST5 - Year-to-year variations of emissions (Figure S5)**

188 Figure S5 represents the evolution of the anomalies of each emission category over the last three  
189 decades. The emission anomalies were calculated as the difference between deseasonalized emissions  
190 (12-month running mean), and the long-term mean of the emissions. A consistent period for estimating  
191 the long-term mean is not suitable to all the data sources. As a result, the long-term mean was  
192 calculated as the mean emission over the stable period 1999-2006, except for wetland (1985-2006) and  
193 for fossil fuel and agriculture/waste inventory estimates (1990-2006). For studies covering shorter  
194 time periods (mainly in the 2000s), the long-term mean was calculated over the period 2000-2006. For  
195 studies starting after the year 2000, the time period used for calculating the long-term mean was  
196 reduced accordingly (e.g. TM5-4DVAR: 2003-2009). The ranges of the anomalies given in the main  
197 text are consistent with those presented in Figure S5.

198 The IAV of CH<sub>4</sub> emissions and sinks is defined by year-to-year fluctuations, superimposed on decadal  
199 trends (see main text for the decadal trend analysis). Over the three decades, natural wetlands  
200 dominate the year-to-year emission variability (Fig. S4). Bottom-up and top-down generally agree on  
201 this result, although different models compute different IAV magnitudes (Fig. S5). Bottom-up models  
202 for wetland emissions, for instance, may differ in their estimation of year-to-year changes, mainly  
203 because of different: 1) spatial distribution of emissions (Fig. S0), 2) structure and parameter values of  
204 wetland extent and CH<sub>4</sub> production, oxidation and transport processes, and 3) modelled sensitivity of  
205 enzyme kinetic and microbial processes to temperature and precipitation. For instance, the IAV of  
206 wetland extent is not fully represented in all wetland-emission models.

207 Two large events are driving the observed year-to-year changes in the atmosphere during the 1990s  
208 (Fig. S5): The Mount Pinatubo volcanic eruption in the Philippines (June 1991) and the large El Niño

209 Southern Oscillation event of 1997-98. The Pinatubo volcanic eruption induced a large seesaw in the  
210 CH<sub>4</sub> growth rate. The initial increase in the growth rate in 1991 was likely caused by the negative  
211 impact of volcanic SO<sub>2</sub> and aerosols on OH production, which may have decreased by 3-5%<sup>10,30</sup>. The  
212 subsequent cooling of the northern hemisphere (NH) following the eruption reduced CH<sub>4</sub> emissions  
213 from wetlands from 1991-93 by 13[3-21] Tg of CH<sub>4</sub> for top-down and 15[9-23] Tg of CH<sub>4</sub> for bottom-  
214 up models, with 67-75% of the emission perturbation located in the Tropics. This consequently  
215 decreased the atmospheric growth rate in 1992-93. The economic collapse of the former USSR also  
216 impacted the growth rate in 1991 and during the following years<sup>31,32,66</sup> with stagnant anthropogenic  
217 emissions at global scale estimated by both top-down and bottom-up.

218 The large El Niño Southern Oscillation event of 1997-98 also affected the CH<sub>4</sub> IAV. At that time,  
219 widespread dry spells caused increased fire activity in the tropics and in boreal regions of Eurasia<sup>33,34</sup>  
220 and reductions in natural wetland emissions. Above-average biomass-burning emissions of up to 21[8-  
221 32] Tg of CH<sub>4</sub> for bottom-up and 10[5-25] Tg of CH<sub>4</sub> for top-down are estimated for 1997-1998,  
222 mostly (85-90%) in tropical regions (Fig. S1 and S2). The 1997-98 large positive anomaly in biomass-  
223 burning emissions is on average two times more prominent in the bottom-up approach than in top-  
224 down inversions, possibly due to the lack of atmospheric measurements near the Indonesian peat fires  
225 attributing the CH<sub>4</sub> anomaly to other regions or sources, or due to dilution by fast vertical mixing.  
226 Natural wetland emissions from bottom-up and top-down consistently show a northern hemisphere-  
227 driven reduction in 1997 of 9[4-12] and 6[1-19] Tg of CH<sub>4</sub> respectively, followed by a tropical-driven  
228 increase in 1998 of 16[9-23] and 17[12-20] Tg of CH<sub>4</sub>, respectively (Fig. S5 and S2).

## 229 **ST6 – IAV variations of sinks**

230 As with the Pinatubo eruption, climate variability can impact the IAV of the chemical destruction of  
231 CH<sub>4</sub> by OH radicals. Fluctuations in OH concentration could explain a large part of the observed  
232 variability of atmospheric CH<sub>4</sub>. Typically, a 1% change in global OH concentration impacts the global  
233 CH<sub>4</sub> budget by up to 5 Tg of CH<sub>4</sub>. The analysis of top-down inversions and bottom-up CCM results  
234 reveals a much better agreement for the IAV of CH<sub>4</sub> loss by OH in the 2000s compared to the 1990s

235 (Fig. S4-e, f): a maximum of IAV is found in the tropics (Fig. S4), and the global IAV of CH<sub>4</sub> loss by  
236 OH is 0.9 and 0.4% for two of the top-down inversions, and 0.9, 0.5 and 0.4% for the three CCMs  
237 providing a full IAV analysis. Indeed, the mean IAV of the CH<sub>4</sub> chemical loss computed from  
238 ACCMIP models is 0.4±0.2%. This value is to be considered as a lower limit because time-slices only  
239 account for internal variability of the models as emissions and sea surface temperatures are constant  
240 within each time-slice. GISS and LMDzORINCA provided transient runs so the calculated inter-  
241 annual variability is somewhat more complete, although annual emissions are interpolated between  
242 varying emissions between decades. The TM5 model provided results with full representation of IAV.  
243 For these three models, IAV is estimated at 0.5% and 0.4% and 0.9% respectively as mentioned  
244 above. These values are the largest of the CCM models used in this work. Without these two models,  
245 the IAV decreases to 0.3±0.2%, suggesting that at least half of the IAV of the CH<sub>4</sub> chemical loss is  
246 due to IAV in trace gas and aerosol emissions.

247 This small IAV during the 2000s, with top-down inversion IAV still twice that of the CCMs, is  
248 consistent with recent estimates of OH concentration IAV since 1998 reported to be less than 5%  
249 when using a box model and less than 3% when using a three dimensional top-down inversion with an  
250 estimate of 1.8±1.2%<sup>29</sup>. The large IAV of CH<sub>4</sub> loss by OH before 1998 is now analysed as an artefact  
251 of the overly large sensitivity of OH concentration inferred from methyl chloroform measurements to  
252 uncertainties in its emissions<sup>29</sup>. An alternative scenario invokes the occurrence of several large El Nino  
253 events<sup>35</sup> before 1998. Finally since 2007, as for the CH<sub>4</sub> sink, year-to-year changes in OH  
254 concentrations are found to be small<sup>29,36</sup>(< 1% per year), and possibly partially offset by the increase of  
255 atmospheric CH<sub>4</sub><sup>37</sup>.

256 In addition, even if ACCMIP models simulate IAV, we cannot discuss specific climate events using  
257 the ACCMIP CH<sub>4</sub> chemical loss because the climate models used for the simulations are not nudged to  
258 meteorological reanalyses. Meteorology depends on the climate that is being simulated in the climate  
259 portion of the models, which will show year-to-year variations, but not necessarily in phase with

260 observed climate events such as El Niño. Finally, only two top-down inversions provided OH fields to  
261 calculate IAV, which explains why only two estimates are shown.

## 262 **ST7 - A simple model for CH<sub>4</sub> emissions from termites (Figure S6)**

263 Several up-scaling approaches have been carried out to quantify the global contribution of termites to  
264 CH<sub>4</sub> emissions<sup>38-40</sup>. However, although the number of available information is increasing, estimates  
265 still show large uncertainties, related to: 1) the effect of soil and mound environments on net CH<sub>4</sub>  
266 emissions, 2) the quantification of termite biomass for each ecosystem type, and 3) the impact of land  
267 use change on termite biomass.

268 We have computed CH<sub>4</sub> emission from termites at global scale as the product of termite biomass  
269 (derived by gross primary production, as proxy of net primary production for tropical ecosystems), a  
270 termite emission factor (fix), and a crop reduction effect (fix). Using as input global GPP products  
271 (GPP<sub>MET</sub><sup>41,42</sup>) and crop distribution maps<sup>43</sup> (new version of Ramankutty and Foley, 1999;  
272 <http://www.geog.mcgill.ca/~nramankutty/Datasets/Datasets.html>) from 1982 to 2007, the equation in  
273 Fig. S6 was applied in a GIS environment to obtain yearly CH<sub>4</sub> emission estimates. First, the GPP of  
274 the “Other-Than-Crop” (OTC) land covers was extracted from GPP<sub>MET</sub>, and termite biomass (g m<sup>-2</sup>)  
275 was calculated. Termite biomass in the crop area was estimated to be 40% of the original pristine  
276 ecosystem, whereas no consistent effect from conversion into pastures and secondary forests was found  
277 <sup>44-47</sup>. Total biomass (Tg of CH<sub>4</sub> per year) per pixel was then aggregated on the basis of natural  
278 vegetation classification<sup>43</sup> for land regions between 35°S and 35°N. To calculate CH<sub>4</sub> emissions  
279 outside ± 35°, i.e. temperate forests, temperate grasslands, and Mediterranean shrublands, the total  
280 suitable land surface (10<sup>6</sup> km<sup>2</sup>) was multiplied with a termite biomass value of 3.0 g m<sup>-2</sup> for temperate  
281 ecosystems<sup>38</sup>, and 4.0 g m<sup>-2</sup> for Mediterranean areas (average value derived from GPP of Australian  
282 mallee areas and data reported for a similar Australian ecosystem<sup>48</sup>).

283 Based on a literature analysis<sup>38,49-51</sup>, we used a CH<sub>4</sub> emission factor of 2.8 ± 1.0 mg CH<sub>4</sub> (g<sup>-1</sup> termite)  
284 for tropical and Mediterranean ecosystems. For temperate forests and grasslands we use the value of

285 1.7 mg CH<sub>4</sub> g<sup>-1</sup> termite<sup>52</sup>. No significant conversion of natural ecosystems into crops was assumed in  
286 these areas during the period 1980-2009.

287 Yearly CH<sub>4</sub> emissions (g m<sup>-2</sup> y<sup>-1</sup>) were finally computed and averaged over three periods 1982-1989,  
288 1990-1999 and 2000-2007 representative of the 1980s', 1990s' and 2000s', respectively. We find  
289 8.7±3.1 Tg of CH<sub>4</sub> per year for the 1980s, 8.7±3.1 Tg of CH<sub>4</sub> per year for the 1990s, and 8.8±3.2 Tg of  
290 CH<sub>4</sub> per year for the 2000s. The uncertainty of the total estimate was calculated 1) by applying error  
291 propagation of products to calculations, which included main variables (termite biomass, CH<sub>4</sub>  
292 emission factor, and land use effect), and 2) by means of error propagation of the sum when global  
293 estimates of CH<sub>4</sub> were computed. These estimates are in the lower bound of current estimates and  
294 show only little inter-annual variability. Regionally, tropical South America and Africa are the main  
295 sources (36 and 30% of the global total emission, respectively) due to the extent of their natural forests  
296 and savanna ecosystems.

297

## 298 **ST8 - The “plant” source**

299 After the 4<sup>th</sup> IPCC Assessment Report one study concluded that plants were able to emit CH<sub>4</sub> under  
300 aerobic conditions contributing a moderate-to-large global source of 62-236 Tg of CH<sub>4</sub> per year to the  
301 global CH<sub>4</sub> budget<sup>53</sup>. This finding was consistent with the first maps of column CH<sub>4</sub> retrieved from the  
302 SCIAMACHY space-borne instrument that revealed a large excess of CH<sub>4</sub> above tropical forests<sup>54</sup>,  
303 although not in agreement on the magnitude of potential plant emissions. However, this correlation  
304 appeared to be fortuitous. Indeed, later improvements to the spectroscopy led to large reductions of the  
305 satellite-observed atmospheric CH<sub>4</sub> excess in the tropics<sup>55</sup>. Although plants may emit CH<sub>4</sub> under  
306 aerobic conditions, additional measurements on plant emissions<sup>56-59</sup> and atmospheric analyses<sup>60</sup> have  
307 not supported that plants, under aerobic conditions, are a significant player in the global CH<sub>4</sub> budget.

308 **I.2 Supporting figures**

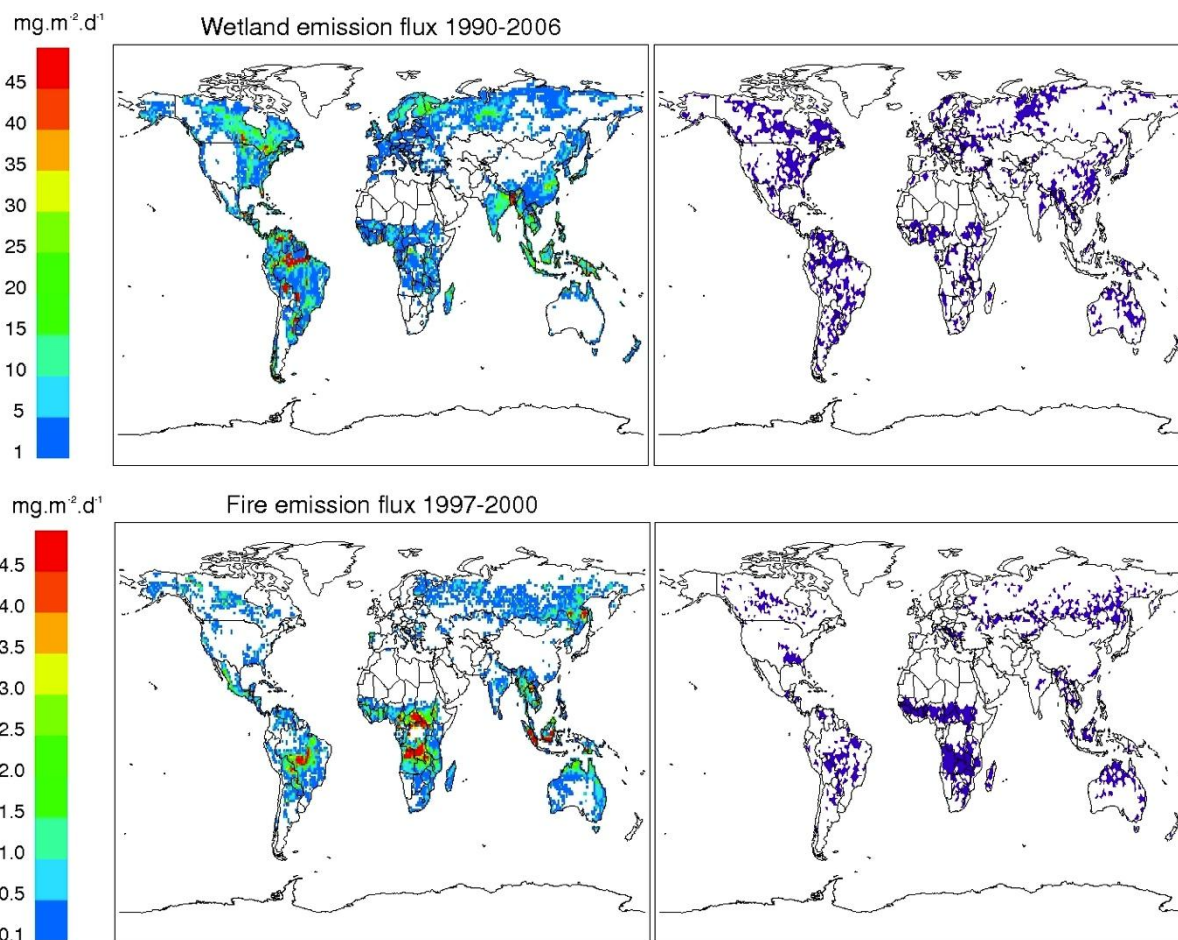

309  
 310 *Figure S0: (Left) Distribution of methane emissions from natural wetlands (top) and fires (bottom) at*  
 311 *1x1° resolution in mgCH<sub>4</sub>/m<sup>2</sup>/day. Note the different color scales. Emissions lower than 1*  
 312 *mgCH<sub>4</sub>/m<sup>2</sup>/day (0.1 for fires) are not shown. Each map is an average over the maximum common*  
 313 *period of time of the different models aggregated in this study. On the right, purple areas indicate grid*  
 314 *cells where the mean emission is larger than the standard deviation between the B-U studies*  
 315 *aggregated to build the map.*

316 *s*

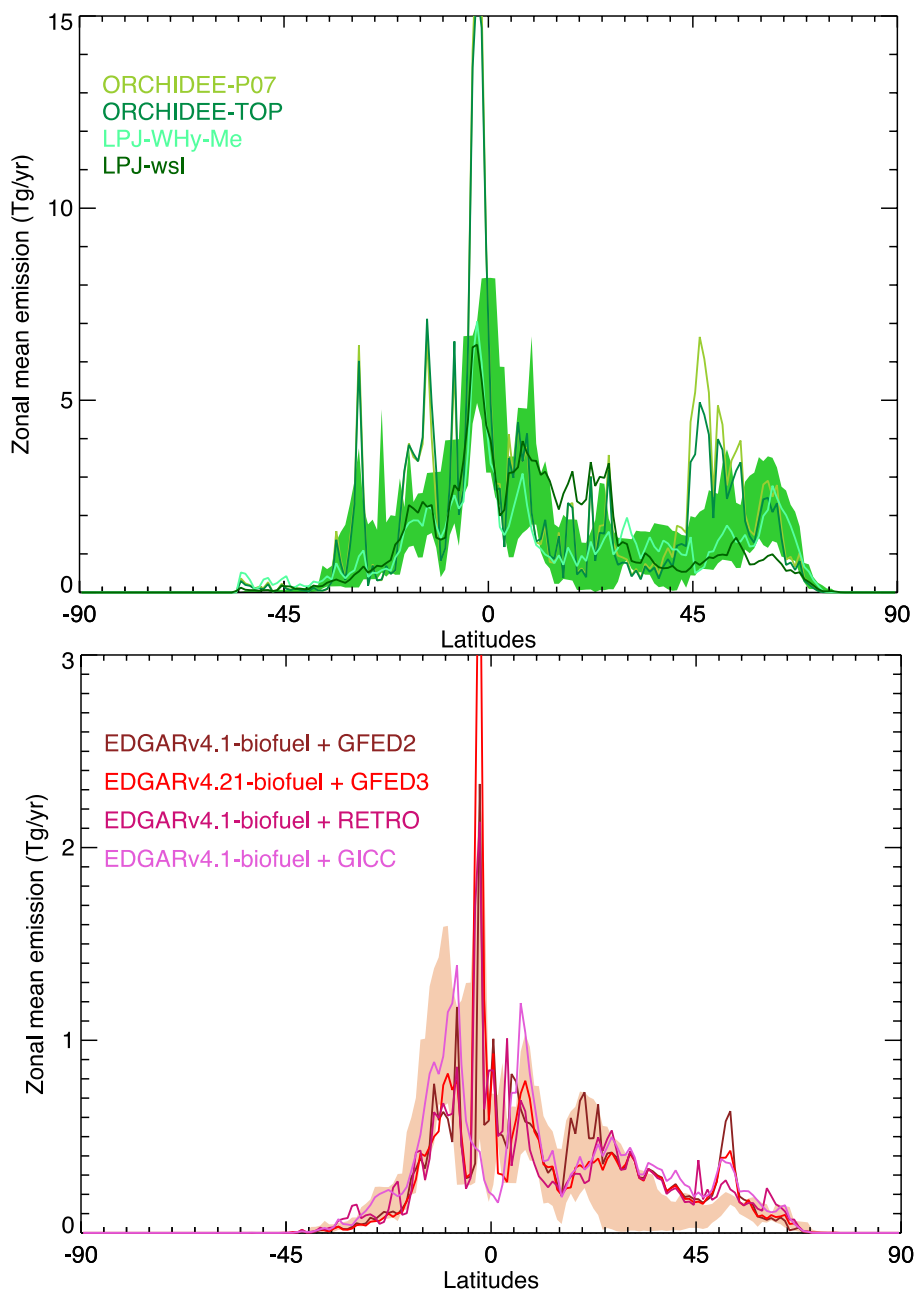

317

318 *Figure S1: Zonal mean fluxes of CH<sub>4</sub> from natural wetlands (top), biomass burning (including biofuel,*  
 319 *middle), and OH loss (bottom). The zonal mean has been computed over the period 1990-2006 for*  
 320 *wetland emissions and 1980-2005 for biomass burning emissions. The coloured lines correspond to B-*  
 321 *U models or inventories as specified in the legend (the same as those used to compute the gridded*  
 322 *maps in Fig. S0). Coloured ranges indicate the minimum and maximum of the zonal mean fluxes*  
 323 *derived from T-D inversions. Zonal mean of methane loss through OH oxidation is computed by the*  
 324 *ACCMIP models and the T-D inversions (PYVAR and LMDZ-MIOP), temporal average being*  
 325 *calculated over the 2000s. Note that vertical scales are different for the three plots.*

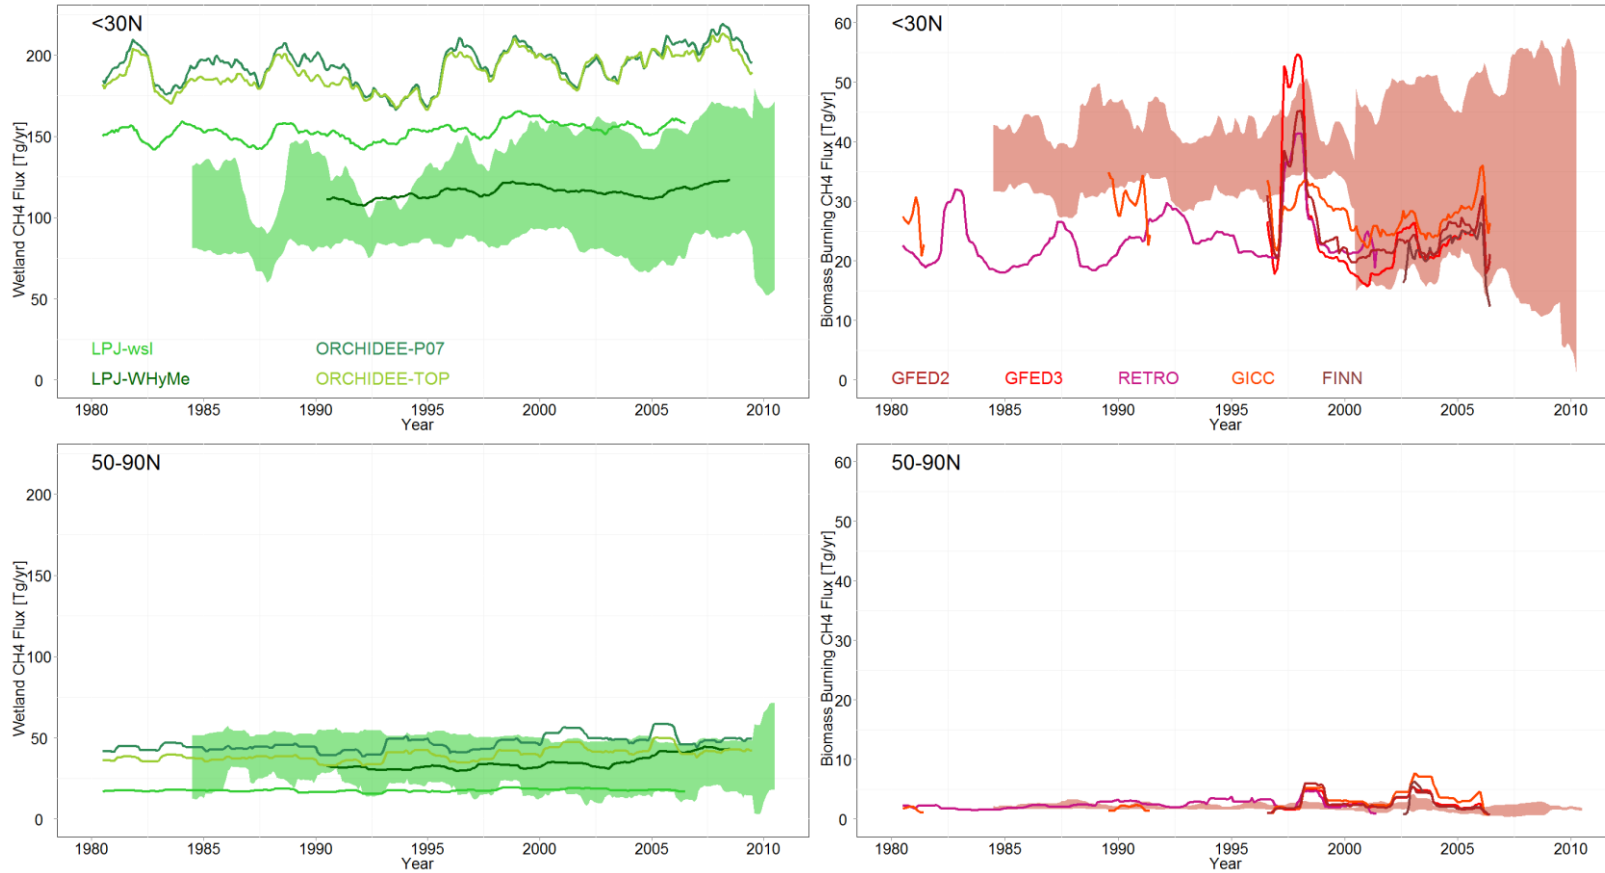

326

327 *Figure S2: Deseasonalized CH<sub>4</sub> emissions from natural wetland emissions (top, in green) and fires (bottom, in red) for two latitudinal bands (Left: Tropics*  
 328 *<30°N, Right: Northern latitudes, 50-90°N). Lines represent B-U models and inventories. Colored ranges are for T-D inversions. Wetland emissions are from*  
 329 *ORCHIDEE<sup>61</sup>, LPJ-WHyMe<sup>62</sup> and LPJ-WSL<sup>63</sup>, and inversions<sup>36,64-66</sup>; biomass-burning emissions are from RETRO<sup>67</sup>, GFEDv2<sup>68</sup>, GFEDv3<sup>34</sup>, GICC<sup>69</sup> and*  
 330 *FINN<sup>70</sup>, and inversions (same as for wetlands). Note that y-axis scales are different for wetland and biomass-burning emissions.*

331



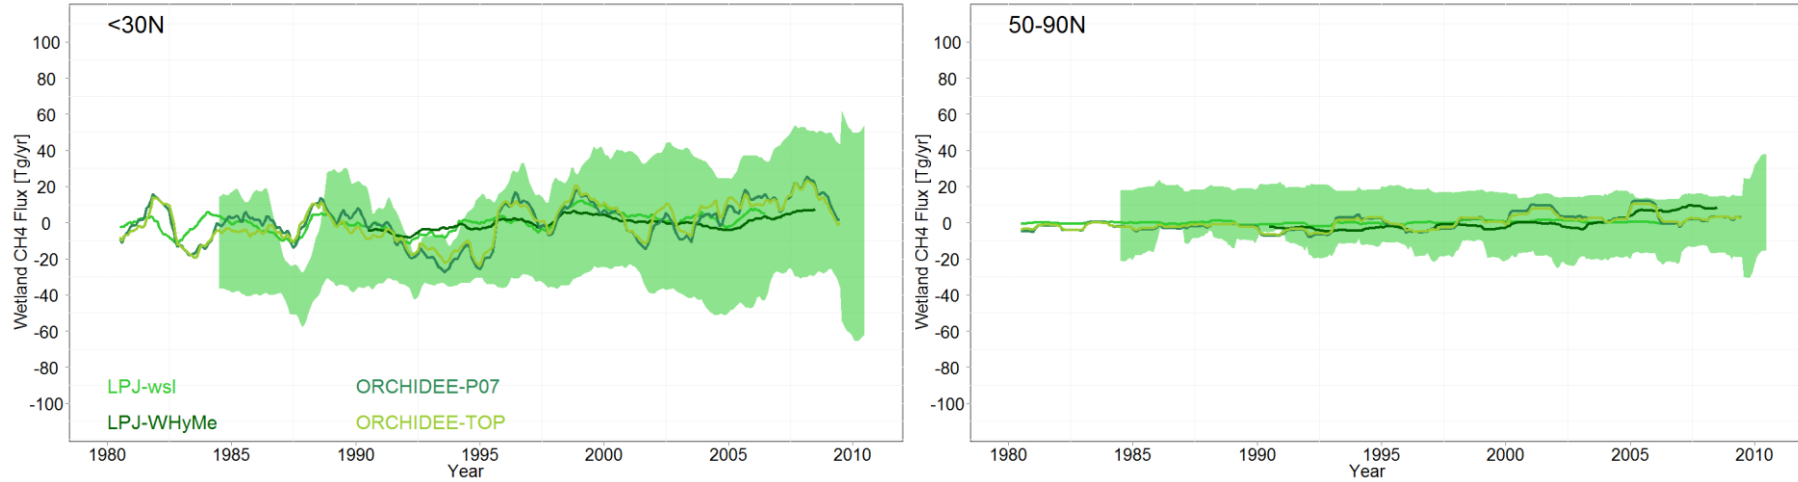

332  
 333 Figure S3: Same as figure S2 but for the anomaly (de-seasonalized time series minus their long-term mean) of  $CH_4$  emissions from natural wetlands (in  
 334  $TgCH_4.yr^{-1}$ ) for two latitudinal bands (Left: Tropics  $<30^\circ N$ , Right: Northern latitudes,  $50-90^\circ N$ ). Lines represent B-U models and inventories. Colored ranges  
 335 are for T-D inversions.

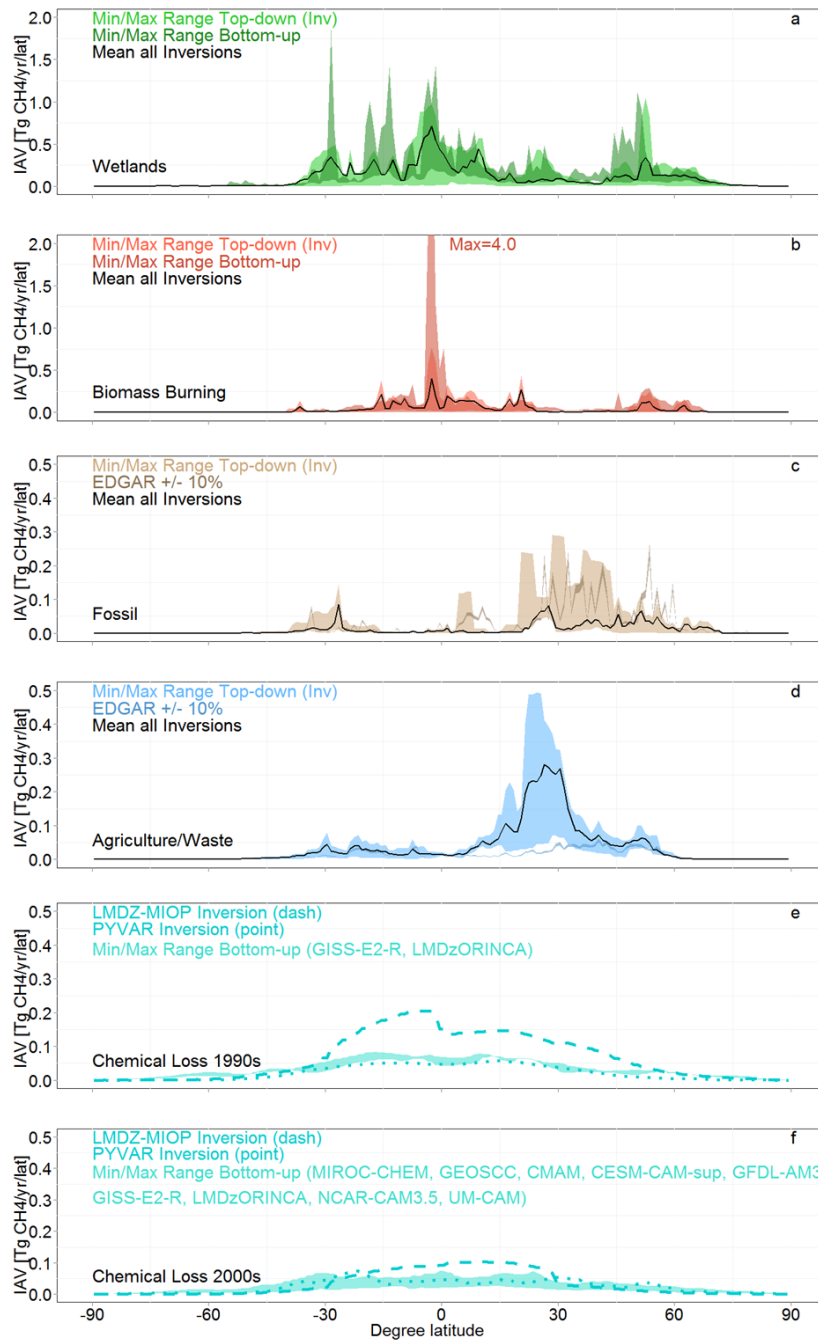

336

337 *Figure S4: Inter-annual variability (IAV) of T-D and B-U emissions and sinks as a function of latitude.*  
 338 *IAV is calculated as the de-trended standard deviation of the zonal emissions and sinks at 1°*  
 339 *resolution. Range of all T-D inversions is shown as light coloured shaded area (except for chemical*  
 340 *loss). Range of all B-U approaches is shown as dark-coloured shaded area (wetland models, fire*  
 341 *models and inventories). From top to bottom: natural wetlands (green), fires (red), fossil fuels*  
 342 *(brown), agriculture/waste (blue), and chemical loss (turquoise) for the 1990s and the 2000s. For*  
 343 *chemical loss, T-D inversions are shown as lines. Note that y-axis scales are extended for wetland and*  
 344 *biomass-burning emission IAV.*

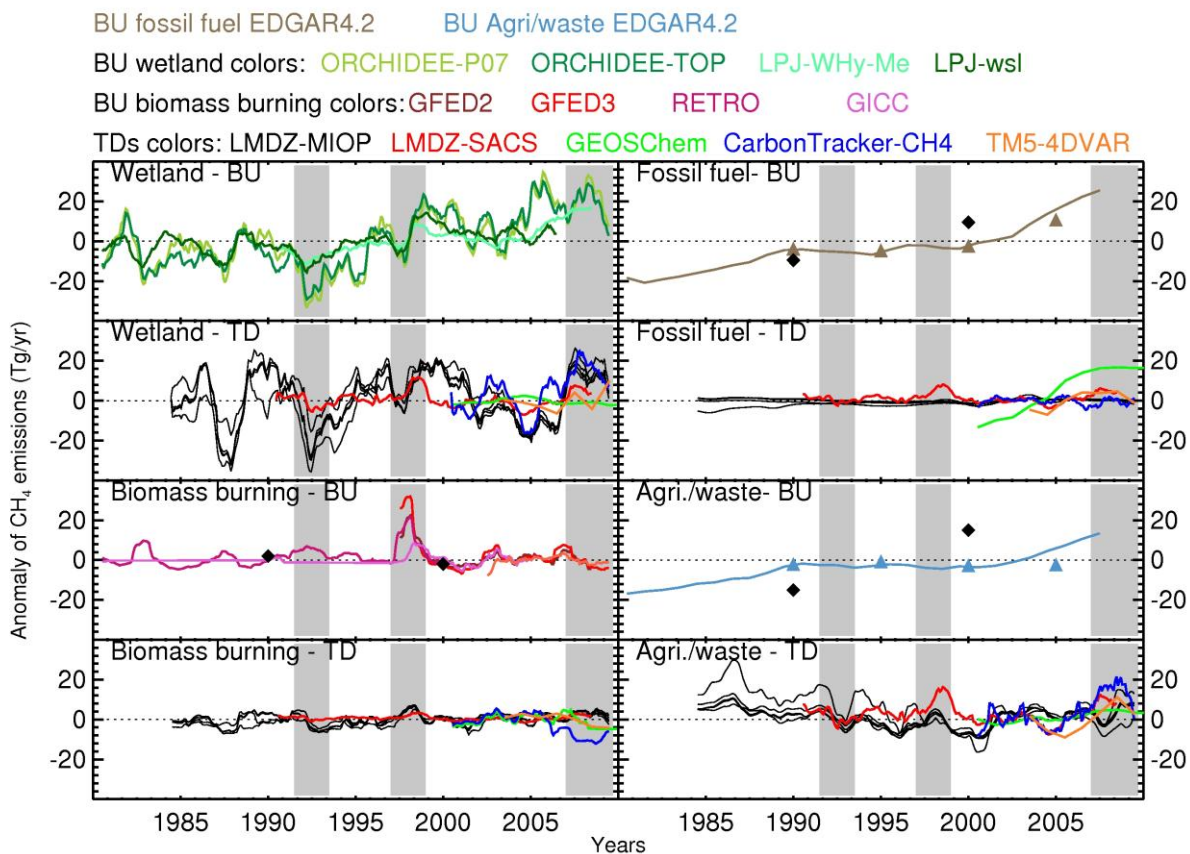

345

346 *Figure S5: Inter-annual variability (IAV) of T-D and B-U emissions over the last three decades.*  
 347 *Anomalies are calculated as the difference between deseasonalized emissions (12-month running*  
 348 *mean), and a long-term mean of the same emission. Long-term mean is calculated as the mean*  
 349 *emission over the stable period 1999-2006, except for wetland (both T-D and B-U, 1985-2006) and for*  
 350 *fossil fuel and agriculture/waste inventories (1990-2006). For studies covering shorter periods the*  
 351 *long term mean is based on a subset of the 1999-2006 period (except for TM5-4DVARbn 2003-2009).*  
 352 *The decadal IASA and EPA inventory values are represented as black diamonds and coloured*  
 353 *triangles, respectively. The shaded grey areas highlight the three time periods discussed in the text*  
 354 *(post-Pinatubo period, 1997-98 El-Nino, and the recent years).*

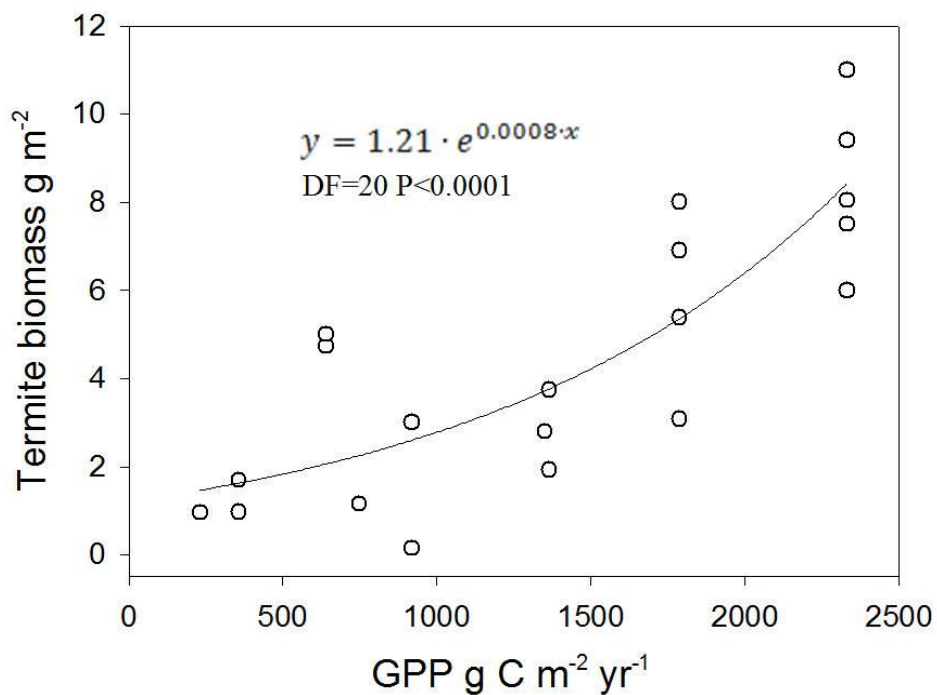

356

357 *Figure S6: Termite biomass vs. mean annual GPP derived from different sources*<sup>71,72</sup> *for tropical*  
358 *areas. Termites biomass data are extracted from the main published studies*<sup>48,49,73-82</sup>.

359

360

361

362

363

364 **I.3 Supporting tables**

365 Table S1: T-D Model main characteristics

|                                                | TM5-ADVAR<br>(Bergamaschi et al., 2009)                                                                                    | LMDZ-MIP<br>(Bousquet et al., 2011)   | CarbonTracker-CH4 (Brubwiler et al., 2011)        | GEOS-Chem<br>(Fraser et al., 2011) | TM5-ADVAR<br>(Houweling et al., 2012)                                        | LMDZ-SACS<br>(Pison et al., 2009, Bousquet et al., 2011)                                            | GCM used by Fung et al., 1991                                                                        | TM2 (Hein et al., 1997)                                                                     | MATCH (Chen & Prinn, 2006)                              |
|------------------------------------------------|----------------------------------------------------------------------------------------------------------------------------|---------------------------------------|---------------------------------------------------|------------------------------------|------------------------------------------------------------------------------|-----------------------------------------------------------------------------------------------------|------------------------------------------------------------------------------------------------------|---------------------------------------------------------------------------------------------|---------------------------------------------------------|
| <b>Data sets (indicate network/instrument)</b> |                                                                                                                            |                                       |                                                   |                                    |                                                                              |                                                                                                     |                                                                                                      |                                                                                             |                                                         |
| <i>Satellite</i>                               | IMAPv5.5 retrievals (Frankenberg et al., 2011) <sup>1</sup>                                                                | /                                     | /                                                 | /                                  | SCIAMACHY<br>IMAPv5.5                                                        | /                                                                                                   | /                                                                                                    | /                                                                                           | /                                                       |
| <i>Ground based</i>                            | NOAA / ESRL (only marine and continental background sites)                                                                 | MCF=AGAGE<br>CH4=CSIRO,<br>NOAA, LSCE | NOAA-ESRL and Environment Canada sites (88 sites) | 48 ESRL sites                      | NOAA-ESRL                                                                    | MCF=NOAA, AGAGE, CH4=CSIRO, EC, NOAA, RAMCES, NIWA, AGAGE (continuous), SAWS, INMA, ENEA, JMA, UBAG | NOAA/CMDL (19 sites), CSIRO (2 sites), 2 additional sites (Cape Point, South Africa; Tsukuba, Japan) | NOAA (30 stations for CH4)<br><br>13CH4 observations (6 stations from UCI, and 1 from NIWA) | NOAA (54 flask sites)<br>AGAGE (5 high frequency sites) |
| <i>Satellite</i> +<br><i>Ground based</i>      | bias correction of satellite data (2nd order polynomial as function of latitude and month) (Bergamaschi et al., JGR, 2009) | /                                     | /                                                 | /                                  | SCIAMACHY inversions are always carried out in combination with surface data | /                                                                                                   | /                                                                                                    | /                                                                                           | /                                                       |

| Prior scenarios  |                                                                                                                                                                                                                                       |                                                                                                                               |                                                    |                                                                                                                                                                                                                                                                  |                                                                                |                                                                                                                                                  |                                                                                                                                                                                                                                                                                                                                                                                                                                                                                                                                                                                          |                           |                                                                                                                                     |
|------------------|---------------------------------------------------------------------------------------------------------------------------------------------------------------------------------------------------------------------------------------|-------------------------------------------------------------------------------------------------------------------------------|----------------------------------------------------|------------------------------------------------------------------------------------------------------------------------------------------------------------------------------------------------------------------------------------------------------------------|--------------------------------------------------------------------------------|--------------------------------------------------------------------------------------------------------------------------------------------------|------------------------------------------------------------------------------------------------------------------------------------------------------------------------------------------------------------------------------------------------------------------------------------------------------------------------------------------------------------------------------------------------------------------------------------------------------------------------------------------------------------------------------------------------------------------------------------------|---------------------------|-------------------------------------------------------------------------------------------------------------------------------------|
| <i>Emissions</i> | anthropogenic emissions (except biomass burning): EDGARv4.1, biomass burning: GFEDv3.1, wetlands: inventory from Jed Kaplan (Bergamaschi et al., JGR, 2007), further minor natural sources as described in (Bergamaschi et al., 2009) | MCF=Montzka et al., 2000 + Bousquet et al., 2006, CH4=EDGAR 3.2, GFED-v2 (van der Werf et al., 2006), Matthews et Fung (1987) | EDGARv3.2, GFED3, Bergamaschi et al. 2007 wetlands | ruminant animals, coal mining, oil production, landfills: EDGAR 3.2 FT (Olivier et al., 2005); biomass burning: GFEDv2 (van der Werf et al., 2006); oceans: Houweling et al., 1999; wetlands and rice: Bloom et al., 2010; termites, hydrates: Fung et al., 1991 | EDGARv4.1 (Anthropogenic), GFED3 (BMB), LPJ-WhyMe (Wetlands) + minor processes | MCF=Montzka et al., 2000 + Bousquet et al., 2006, CH4=EDGAR 3, GFED-v2 (van der Werf et al., 2006), Fung et al. (1991), constant over the oceans | Wetlands: Matthews and Fung, 1987; rice: Matthews et al., 1991; animals: based on Crutzen et al., 1986 and Lerner et al., 1988; natural gas: U.S. Department of Energy, 1986, U.N. Department of International Economic and Social Affairs, 1986; coal: Espenshade, 1978, Central Intelligence Agency, 1978 and 1986, Seydliyz Weltatlas 1984, U.N. Department of International Economic and Social Affairs, 1986; biomass burning: Houghton et al., 1987; termites: based on Matthews, 1983, Zimmermann et al., 1982 and 1983, Fraser et al., 1986; hydrates: based on Kvenvolden, 1988 | Based on Fung et al., 991 | Adapted from Fung et al., 1991 For wetland and rice<br><br>EDGAR3.0 for anthropogenic<br><br>Hao and Liu [1994] for biomass burning |

|                                      |                                                                                                                                                                |                                                      |                                                                                                                                                                |                                                                                                                                                                                                                     |                                                   |                                                 |                                                                                       |                                                             |                                              |
|--------------------------------------|----------------------------------------------------------------------------------------------------------------------------------------------------------------|------------------------------------------------------|----------------------------------------------------------------------------------------------------------------------------------------------------------------|---------------------------------------------------------------------------------------------------------------------------------------------------------------------------------------------------------------------|---------------------------------------------------|-------------------------------------------------|---------------------------------------------------------------------------------------|-------------------------------------------------------------|----------------------------------------------|
| <i>Sinks</i>                         | troposphere: TM5-OH (Bergamaschi et al., 2009), stratosphere: OH, O(1D) and Cl from 2D MPI model (Brühl and Crutzen, 1993), soil sink: (Ridgwell et al., 1999) | Prior OH Field from MOZART model (Hauglustaine 2004) | troposphere: TM5-OH (Bergamaschi et al., 2007), stratosphere: OH, O(1D) and Cl from 2D MPI model (Brühl and Crutzen, 1993), soil sink: (Ridgwell et al., 1999) | OH: 3D monthly fields from a full-chemistry Ox-NOx-VOC run of the GEOS-Chem model (Fiore et al., 2003); soil sink: Fung et al. 1991; stratospheric loss: adapted from a 2-D stratospheric model (Wang et al., 2004) | Climatological OH based on Montzka, Science, 2011 | Prior OH fields by INCA                         | OH: Spivakovsky et al., 1990a,b; soils: based on Born et al., 1990 and Matthews, 1983 | OH Computed with the chemistry-transport model of the paper | OH output of a T62 run of the MATCH model,   |
| <b>Meteorological forcing</b>        | ECMWF Era-Interim                                                                                                                                              | LMDZ on-line nudged on ERA40                         | ECMWF Forecast                                                                                                                                                 | GEOS5                                                                                                                                                                                                               | ECMWF ERA-interim                                 | LMDZ on-line nudged on ERA40                    | Hansen et al., 1983                                                                   | ECMWF analysis                                              | NCEP reanalysis                              |
| <b>Model characteristics</b>         |                                                                                                                                                                |                                                      |                                                                                                                                                                |                                                                                                                                                                                                                     |                                                   |                                                 |                                                                                       |                                                             |                                              |
| <i>Resolution (lonxlatxlev)</i>      | 6x4 degrees; 25 vertical layers                                                                                                                                | 3.75degreesx2.5degreesx19 sigma-pressure levels      | 6x4 degrees, 25-34 levels                                                                                                                                      | 5x4x47                                                                                                                                                                                                              | 6x4x25 (degree lon, degree lat, # layers)         | 3.75degreesx2.5degreesx19 sigma-pressure levels | 4x5 (degree lat, degree lon), 9 vertical layers                                       | 7.5x7.5 (degree lat, degree lon), 14 vertical layers        | 1.8x1.8 lat, degree lon), 28 vertical layers |
| <i>PBL scheme</i>                    | Holtslag and Moeng, 1991]                                                                                                                                      | Local closure                                        | Holtslag and Moeng, 1991                                                                                                                                       | VDIFF (Lin & McElroy, 2010)                                                                                                                                                                                         | Holtslag & Moeng (J. Atmos. Sci., 1991)           | Local closure                                   |                                                                                       | Local closure based on Louis, 1979                          |                                              |
| <i>Convection scheme</i>             | Tiedke, 1989                                                                                                                                                   | Tiedtke et al., 1989                                 | Tiedtke, 1989                                                                                                                                                  | Relaxed Arakawa-Schubert scheme (Moorthi and Suarez, 1992)                                                                                                                                                          | Tiedtke (Mon. Wea. Rev., 1989)                    | Tiedtke et al., 1989                            | Arakawa scheme B                                                                      | Tiedtke et al., 1989                                        |                                              |
| <b>Inversion</b>                     |                                                                                                                                                                |                                                      |                                                                                                                                                                |                                                                                                                                                                                                                     |                                                   |                                                 |                                                                                       |                                                             |                                              |
| <i>Time resolution (flux domain)</i> | monthly                                                                                                                                                        | one month                                            | Weekly aggregated to monthly                                                                                                                                   | 8 day                                                                                                                                                                                                               | monthly                                           | one week                                        |                                                                                       | monthly                                                     | Monthly                                      |

|                                         |                         |                                  |                                                                       |                                                                                            |                      |                                  |           |                    |                             |
|-----------------------------------------|-------------------------|----------------------------------|-----------------------------------------------------------------------|--------------------------------------------------------------------------------------------|----------------------|----------------------------------|-----------|--------------------|-----------------------------|
| <i>Spatial resolution</i>               | grid cell (6x4 degrees) | 10 land regions + 1 ocean region | 120 land regions based on source process and Transcom region, 1 ocean | Based on Transcom (Gurney et al., 2002): 99 land regions + 11 ocean regions + 1 ice region | 6x4 degree           | grid cell (3.75 °x2.5°)          |           | Global per process | Large regions and processes |
| <i>Correlation length (flux domain)</i> | 500 km                  | /                                |                                                                       | /                                                                                          | 1000 km              | 500 km on land, 1000 km on ocean |           | /                  |                             |
| <i>Minimizer</i>                        | m1qn3                   | Analytical solution              | Ensemble Kalman smoother                                              | ensemble Kalman filter                                                                     | Variational approach | m1qn3                            | /         | /                  | Kalman filter               |
| <i>Time window</i>                      | 2003-2010               | 1983-2010                        | 2000-2011                                                             | 2000-2010                                                                                  | 2003-2010            | 1990-2008                        | 1980-1989 | 1983-1989          | 1996-2001                   |

366



367 Table S2: Estimated CH<sub>4</sub> fluxes corresponding to the regional bar plots in Fig. 3. Values are given in  
 368 Tg yr<sup>-1</sup> (**mean** [min-max]) for the 2000s.

| Region                   |     | Wetlands          | Biomass-burning | Fossil Fuels      | Agriculture/Waste | Other Sources   | Soil Sink       | OH Chemical Sink |
|--------------------------|-----|-------------------|-----------------|-------------------|-------------------|-----------------|-----------------|------------------|
| Africa                   | T-D | <b>36</b> [20-48] | <b>9</b> [7-14] | <b>7</b> [3-13]   | <b>18</b> [16-22] | <b>9</b> [7-15] | <b>8</b> [5-12] | <b>43</b> [NA]   |
|                          | B-U | <b>24</b> [22-27] | <b>8</b> [6-12] | <b>9</b> [7-11]   | <b>21</b> [13-29] | NA              | NA              | NA               |
| Australia                | T-D | <b>4</b> [0-11]   | <b>0</b> [0-1]  | <b>1</b> [0-2]    | <b>3</b> [2-5]    | <b>1</b> [1-2]  | <b>2</b> [1-3]  | <b>12</b> [NA]   |
|                          | B-U | <b>3</b> [2-3]    | <b>1</b> [0-2]  | <b>1</b> [1-2]    | <b>5</b> [4-6]    | NA              | NA              | NA               |
| China                    | T-D | <b>6</b> [2-12]   | <b>1</b> [0-3]  | <b>15</b> [9-21]  | <b>29</b> [21-36] | <b>1</b> [1-2]  | <b>2</b> [1-2]  | <b>8</b> [NA]    |
|                          | B-U | <b>7</b> [5-10]   | <b>4</b> [4-5]  | <b>12</b> [10-13] | <b>28</b> [25-31] | NA              | NA              | NA               |
| Eurasia, boreal          | T-D | <b>14</b> [9-23]  | <b>1</b> [1-2]  | <b>7</b> [3-11]   | <b>2</b> [1-3]    | <b>1</b> [0-1]  | <b>3</b> [1-5]  | <b>4</b> [NA]    |
|                          | B-U | <b>9</b> [4-13]   | <b>1</b> [1-2]  | <b>11</b> [6-17]  | <b>4</b> [2-6]    | NA              | NA              | NA               |
| Eurasia, temperate       | T-D | <b>4</b> [0-13]   | <b>0</b> [0-1]  | <b>14</b> [9-17]  | <b>13</b> [12-15] | <b>2</b> [1-3]  | <b>2</b> [2-3]  | <b>14</b> [NA]   |
|                          | B-U | <b>2</b> [2-2]    | <b>1</b> [0-1]  | <b>15</b> [13-18] | <b>15</b> [15-16] | NA              | NA              | NA               |
| Europe                   | T-D | <b>10</b> [4-19]  | <b>0</b> [0-1]  | <b>18</b> [7-23]  | <b>20</b> [13-26] | <b>1</b> [1-2]  | <b>2</b> [2-3]  | <b>8</b> [NA]    |
|                          | B-U | <b>10</b> [5-17]  | <b>2</b> [0-2]  | <b>17</b> [9-26]  | <b>25</b> [22-28] | NA              | NA              | NA               |
| India                    | T-D | <b>2</b> [0-4]    | <b>1</b> [0-3]  | <b>2</b> [2-4]    | <b>27</b> [19-43] | <b>1</b> [1-1]  | <b>1</b> [0-1]  | <b>5</b> [NA]    |
|                          | B-U | <b>9</b> [5-16]   | <b>2</b> [2-2]  | <b>2</b> [2-3]    | <b>22</b> [20-24] | NA              | NA              | NA               |
| North America, boreal    | T-D | <b>9</b> [6-17]   | <b>0</b> [0-1]  | <b>0</b> [0-1]    | <b>0</b> [0-1]    | <b>1</b> [0-2]  | <b>2</b> [1-2]  | <b>3</b> [NA]    |
|                          | B-U | <b>16</b> [9-28]  | <b>0</b> [0-1]  | <b>1</b> [0-2]    | <b>1</b> [0-2]    | NA              | NA              | NA               |
| North America, temperate | T-D | <b>8</b> [6-11]   | <b>0</b> [0-1]  | <b>18</b> [8-27]  | <b>24</b> [21-31] | <b>2</b> [1-3]  | <b>3</b> [2-4]  | <b>13</b> [NA]   |
|                          | B-U | <b>17</b> [10-29] | <b>1</b> [0-1]  | <b>14</b> [13-15] | <b>21</b> [21-21] | NA              | NA              | NA               |
| South America, temperate | T-D | <b>19</b> [10-32] | <b>2</b> [0-3]  | <b>1</b> [0-2]    | <b>19</b> [16-23] | <b>2</b> [2-3]  | <b>3</b> [1-4]  | <b>15</b> [NA]   |
|                          | B-U | <b>23</b> [17-31] | <b>1</b> [1-2]  | <b>1</b> [1-2]    | <b>11</b> [6-17]  | NA              | NA              | NA               |
| South America, tropical  | T-D | <b>28</b> [17-48] | <b>5</b> [3-9]  | <b>2</b> [1-3]    | <b>7</b> [6-9]    | <b>4</b> [3-7]  | <b>2</b> [0-4]  | <b>16</b> [NA]   |
|                          | B-U | <b>58</b> [39-92] | <b>4</b> [2-4]  | <b>3</b> [3-3]    | <b>15</b> [7-23]  | NA              | NA              | NA               |
| South East Asia          | T-D | <b>19</b> [7-32]  | <b>4</b> [3-6]  | <b>4</b> [2-6]    | <b>18</b> [10-32] | <b>2</b> [1-4]  | <b>1</b> [0-2]  | <b>10</b> [NA]   |
|                          | B-U | <b>26</b> [14-37] | <b>5</b> [2-7]  | <b>4</b> [3-5]    | <b>21</b> [19-24] | NA              | NA              | NA               |

369

370 Table S3: Estimated regional CH<sub>4</sub> fluxes for each model corresponding to bar plots in Fig. 3. Values are given in Tg yr<sup>-1</sup> for the 2000s.

371

|                                 | LMDZ-MIOP (Bousquet et al., 2011) | TM5-4DVAR (Houweling et al., 2012) | CarbonTracker-CH <sub>4</sub> (Bruhwiler et al., 2011) | TM5-4DVAR (Bergamaschi et al., 2009) | GEOS-Chem (Fraser et al., 2011) | LMDZt-SACS (Pison et al., 2009; Bousquet et al., 2011) | LPJ-wsl (Hodson et al., 2011) | LPJ-WhyMe (Spahni et al., 2011) | ORCHIDEE (Ringer et al., 2011) | GFEDv3 (Van der Werf et al., 2010) | RETRO (Schultz et al., 2007) | GICC (Mieville et al., 2010) | FINNv1 (Wiedinmeyer et al., 2011) | GFEDv2 (Van der Werf et al., 2004) | EDGARv4.1 (EDGAR4.1, 2009) | EPA, 2011 |
|---------------------------------|-----------------------------------|------------------------------------|--------------------------------------------------------|--------------------------------------|---------------------------------|--------------------------------------------------------|-------------------------------|---------------------------------|--------------------------------|------------------------------------|------------------------------|------------------------------|-----------------------------------|------------------------------------|----------------------------|-----------|
| <b>North America, boreal</b>    |                                   |                                    |                                                        |                                      |                                 |                                                        |                               |                                 |                                |                                    |                              |                              |                                   |                                    |                            |           |
| Wetland                         | 9.0                               | 5.9                                | 6.6                                                    | 8.1                                  | 5.7                             | 17.0                                                   | 10.8                          | 9.2                             | 28.3                           |                                    |                              |                              |                                   |                                    |                            |           |
| Biomass Burning                 | 0.5                               | 0.7                                | 0.3                                                    | 0.6                                  | 0.3                             | 0.3                                                    |                               |                                 |                                | 0.5                                | 0.6                          | 0.7                          | 0.2                               | 0.3                                |                            |           |
| Fossil                          | 1.0                               | 0.4                                | 0.2                                                    | 0.2                                  | 0.3                             | 0.9                                                    |                               |                                 |                                |                                    |                              |                              |                                   |                                    | 0.1                        | 2.2       |
| Agriwaste                       | 0.8                               | 0.6                                | 0.2                                                    | 0.4                                  | 0.3                             | 0.4                                                    |                               |                                 |                                |                                    |                              |                              |                                   |                                    | 0.2                        | 2.3       |
| Other                           | 0.3                               | 1.6                                | 0.4                                                    | 0.9                                  | 0.6                             | 0.2                                                    |                               |                                 |                                |                                    |                              |                              |                                   |                                    |                            |           |
| Soil                            | -1.8 /                            |                                    | -0.8                                                   | -1.1                                 | -2.3 /                          |                                                        |                               |                                 |                                |                                    |                              |                              |                                   |                                    |                            |           |
| <b>North America, temperate</b> |                                   |                                    |                                                        |                                      |                                 |                                                        |                               |                                 |                                |                                    |                              |                              |                                   |                                    |                            |           |
| Wetland                         | 7.6                               | 7.1                                | 8.9                                                    | 7.2                                  | 10.8                            | 7.4                                                    | 9.8                           | 11.2                            | 28.8                           |                                    |                              |                              |                                   |                                    |                            |           |
| Biomass Burning                 | 0.9                               | 0.2                                | 0.2                                                    | 0.5                                  | 0.2                             | 1.0                                                    |                               |                                 |                                | 0.6                                | 1.2                          | 1.5                          | 0.9                               | 0.8                                |                            |           |
| Fossil                          | 27.2                              | 15.9                               | 8.0                                                    | 14.1                                 | 15.0                            | 25.8                                                   |                               |                                 |                                |                                    |                              |                              |                                   |                                    | 13.4                       | 14.8      |
| Agriwaste                       | 20.8                              | 23.4                               | 31.3                                                   | 21.8                                 | 23.8                            | 25.5                                                   |                               |                                 |                                |                                    |                              |                              |                                   |                                    | 20.7                       | 20.9      |
| Other                           | 1.1                               | 3.2                                | 0.8                                                    | 1.3                                  | 1.4                             | 1.2                                                    |                               |                                 |                                |                                    |                              |                              |                                   |                                    |                            |           |
| Soil                            | -2.8 /                            |                                    | -2.8                                                   | -3.9                                 | -2.5 /                          |                                                        |                               |                                 |                                |                                    |                              |                              |                                   |                                    |                            |           |

### South America, tropical

|                 |        |      |      |      |        |      |      |      |      |     |     |     |     |          |
|-----------------|--------|------|------|------|--------|------|------|------|------|-----|-----|-----|-----|----------|
| Wetland         | 20.4   | 26.6 | 28.8 | 47.5 | 29.8   | 16.8 | 38.6 | 42.4 | 92.1 |     |     |     |     |          |
| Biomass Burning | 9.4    | 4.2  | 3.1  | 3.1  | 2.9    | 8.4  |      |      |      | 2.5 | 3.4 | 3.8 | 4.5 | 4.1      |
| Fossil          | 1.1    | 2.4  | 0.7  | 2.8  | 1.2    | 1.8  |      |      |      |     |     |     |     | 2.8 3.0  |
| Agriwaste       | 6.8    | 6.1  | 8.6  | 7.9  | 6.3    | 7.6  |      |      |      |     |     |     |     | 7.1 22.8 |
| Other           | 3.2    | 6.8  | 4.9  | 4.9  | 2.9    | 2.6  |      |      |      |     |     |     |     |          |
| Soil            | -0.9 / |      | -3.0 | -3.6 | -0.4 / |      |      |      |      |     |     |     |     |          |

### South America, temperate

|                 |        |      |      |      |        |      |      |      |      |     |     |     |     |          |
|-----------------|--------|------|------|------|--------|------|------|------|------|-----|-----|-----|-----|----------|
| Wetland         | 20.3   | 10.2 | 31.9 | 16.7 | 15.0   | 21.4 | 16.7 | 20.9 | 31.1 |     |     |     |     |          |
| Biomass Burning | 3.0    | 1.7  | 0.5  | 1.5  | 1.2    | 3.0  |      |      |      | 1.0 | 2.0 | 2.4 | 1.0 | 1.0      |
| Fossil          | 1.0    | 2.0  | 0.5  | 1.9  | 1.2    | 0.9  |      |      |      |     |     |     |     | 2.1 0.7  |
| Agriwaste       | 16.8   | 20.8 | 22.6 | 20.3 | 15.9   | 18.3 |      |      |      |     |     |     |     | 17.2 5.6 |
| Other           | 2.0    | 3.3  | 2.2  | 2.8  | 2.1    | 2.1  |      |      |      |     |     |     |     |          |
| Soil            | -1.6 / |      | -3.6 | -4.3 | -0.9 / |      |      |      |      |     |     |     |     |          |

### Europe

|                 |        |      |      |      |        |      |     |      |     |     |     |     |     |           |
|-----------------|--------|------|------|------|--------|------|-----|------|-----|-----|-----|-----|-----|-----------|
| Wetland         | 10.4   | 5.0  | 6.8  | 3.8  | 15.4   | 18.8 | 4.8 | 16.7 | 9.4 |     |     |     |     |           |
| Biomass Burning | 1.1    | 0.2  | 0.2  | 1.0  | 0.2    | 0.7  |     |      |     | 1.8 | 1.9 | 0.4 | 2.1 | 1.8       |
| Fossil          | 23.0   | 21.1 | 19.0 | 18.3 | 7.4    | 20.3 |     |      |     |     |     |     |     | 25.9 8.8  |
| Agriwaste       | 22.3   | 14.9 | 26.0 | 13.3 | 18.6   | 22.8 |     |      |     |     |     |     |     | 27.6 22.0 |
| Other           | 0.8    | 2.0  | 0.9  | 0.8  | 1.2    | 0.6  |     |      |     |     |     |     |     |           |
| Soil            | -2.2 / |      | -2.3 | -1.7 | -2.9 / |      |     |      |     |     |     |     |     |           |

### Africa

|         |      |      |      |      |      |      |      |      |      |  |  |  |  |  |
|---------|------|------|------|------|------|------|------|------|------|--|--|--|--|--|
| Wetland | 36.2 | 20.4 | 46.2 | 44.7 | 47.8 | 19.7 | 22.1 | 23.7 | 27.4 |  |  |  |  |  |
|---------|------|------|------|------|------|------|------|------|------|--|--|--|--|--|

|                 |        |      |      |       |        |      |  |  |  |     |     |      |     |      |      |
|-----------------|--------|------|------|-------|--------|------|--|--|--|-----|-----|------|-----|------|------|
| Biomass Burning | 13.9   | 7.6  | 6.7  | 8.3   | 7.3    | 11.6 |  |  |  | 8.6 | 7.7 | 11.6 | 5.9 | 8.4  |      |
| Fossil          | 3.8    | 13.4 | 8.9  | 8.9   | 5.4    | 3.5  |  |  |  |     |     |      |     | 6.8  | 11.0 |
| Agriwaste       | 16.0   | 20.4 | 16.8 | 22.3  | 16.1   | 15.6 |  |  |  |     |     |      |     | 13.4 | 29.1 |
| Other           | 6.9    | 15.2 | 9.0  | 12.0  | 6.5    | 6.7  |  |  |  |     |     |      |     |      |      |
| Soil            | -5.6 / |      | -9.2 | -12.1 | -4.7 / |      |  |  |  |     |     |      |     |      |      |

### Eurasia, temperate

|                 |        |      |      |      |        |      |     |     |     |     |     |     |     |      |      |
|-----------------|--------|------|------|------|--------|------|-----|-----|-----|-----|-----|-----|-----|------|------|
| Wetland         | 3.5    | -1.3 | 1.8  | 0.9  | 13.3   | 2.9  | 1.7 | 1.7 | 1.8 |     |     |     |     |      |      |
| Biomass Burning | 0.9    | 0.1  | 0.1  | 0.5  | 0.0    | 0.9  |     |     |     | 0.5 | 0.3 | 0.7 | 0.6 | 0.5  |      |
| Fossil          | 14.6   | 14.1 | 11.1 | 16.5 | 14.5   | 12.1 |     |     |     |     |     |     |     | 12.6 | 17.9 |
| Agriwaste       | 12.3   | 13.3 | 14.8 | 13.9 | 11.6   | 14.8 |     |     |     |     |     |     |     | 14.6 | 16.1 |
| Other           | 1.2    | 3.3  | 1.2  | 1.5  | 1.6    | 1.2  |     |     |     |     |     |     |     |      |      |
| Soil            | -2.0 / |      | -2.8 | -2.7 | -1.7 / |      |     |     |     |     |     |     |     |      |      |

### Eurasia, boreal

|                 |        |     |      |      |        |      |     |      |     |     |     |     |     |     |      |
|-----------------|--------|-----|------|------|--------|------|-----|------|-----|-----|-----|-----|-----|-----|------|
| Wetland         | 12.5   | 9.1 | 12.2 | 10.6 | 13.9   | 22.9 | 4.4 | 12.8 | 9.3 |     |     |     |     |     |      |
| Biomass Burning | 1.3    | 0.9 | 0.9  | 1.0  | 1.3    | 1.0  |     |      |     | 1.5 | 0.7 | 1.8 | 1.5 | 1.7 |      |
| Fossil          | 10.7   | 4.6 | 9.3  | 3.2  | 3.6    | 9.7  |     |      |     |     |     |     |     | 5.9 | 16.8 |
| Agriwaste       | 2.8    | 1.6 | 1.9  | 1.3  | 1.4    | 2.5  |     |      |     |     |     |     |     | 2.4 | 6.1  |
| Other           | 0.7    | 1.4 | 0.6  | 0.8  | 0.7    | 0.5  |     |      |     |     |     |     |     |     |      |
| Soil            | -3.9 / |     | -1.8 | -1.4 | -4.5 / |      |     |      |     |     |     |     |     |     |      |

### China

|                 |      |      |      |      |      |      |     |     |     |     |     |     |     |      |      |
|-----------------|------|------|------|------|------|------|-----|-----|-----|-----|-----|-----|-----|------|------|
| Wetland         | 4.8  | 5.0  | 4.2  | 2.5  | 12.4 | 4.9  | 6.8 | 9.9 | 5.3 |     |     |     |     |      |      |
| Biomass Burning | 3.0  | 0.1  | 0.1  | 1.8  | 0.2  | 3.2  |     |     |     | 4.1 | 4.2 | 4.2 | 4.4 | 4.1  |      |
| Fossil          | 13.7 | 17.9 | 8.6  | 11.1 | 20.5 | 16.0 |     |     |     |     |     |     |     | 13.4 | 10.1 |
| Agriwaste       | 27.4 | 28.0 | 36.3 | 26.5 | 21.3 | 33.7 |     |     |     |     |     |     |     | 30.9 | 25.2 |
| Other           | 1.2  | 1.5  | 0.9  | 0.6  | 1.2  | 1.3  |     |     |     |     |     |     |     |      |      |

|      |        |      |      |        |
|------|--------|------|------|--------|
| Soil | -2.0 / | -2.0 | -1.2 | -1.5 / |
|------|--------|------|------|--------|

### India

|                 |        |      |      |        |      |      |      |      |     |     |     |
|-----------------|--------|------|------|--------|------|------|------|------|-----|-----|-----|
| Wetland         | 1.4    | 4.0  | 0.2  | 4.0    | 1.9  | 0.2  | 16.3 | 5.2  | 6.0 |     |     |
| Biomass Burning | 2.8    | 0.3  | 0.1  | 1.6    | 0.1  | 3.0  | 1.8  | 1.7  | 2.3 | 2.2 | 1.8 |
| Fossil          | 1.8    | 4.3  | 1.6  | 2.1    | 1.8  | 2.0  | 1.9  | 3.1  |     |     |     |
| Agriwaste       | 26.0   | 22.2 | 42.6 | 19.1   | 22.7 | 30.0 | 20.5 | 24.2 |     |     |     |
| Other           | 0.8    | 1.3  | 0.8  | 0.7    | 0.7  | 0.8  |      |      |     |     |     |
| Soil            | -0.6 / | -1.1 | -0.8 | -0.3 / |      |      |      |      |     |     |     |

### Australia

|                 |        |      |      |        |     |     |     |     |     |     |     |
|-----------------|--------|------|------|--------|-----|-----|-----|-----|-----|-----|-----|
| Wetland         | 1.1    | -0.4 | 11.2 | 1.2    | 0.5 | 4.0 | 3.3 | 2.7 | 2.6 |     |     |
| Biomass Burning | 0.5    | 0.1  | 0.6  | 0.3    | 0.5 | 1.0 | 0.7 | 0.9 | 1.9 | 0.2 | 0.8 |
| Fossil          | 0.4    | 0.6  | 1.6  | 0.5    | 1.5 | 1.4 | 1.1 | 1.2 |     |     |     |
| Agriwaste       | 2.9    | 2.3  | 3.1  | 2.0    | 3.3 | 4.5 | 4.4 | 5.6 |     |     |     |
| Other           | 1.3    | 1.5  | 1.3  | 1.4    | 1.7 | 1.4 |     |     |     |     |     |
| Soil            | -1.7 / | -3.2 | -2.7 | -1.1 / |     |     |     |     |     |     |     |

### South East Asia

|                 |        |      |      |        |      |      |      |      |      |     |     |
|-----------------|--------|------|------|--------|------|------|------|------|------|-----|-----|
| Wetland         | 21.9   | 7.1  | 32.0 | 21.9   | 13.3 | 16.4 | 36.6 | 14.4 | 27.5 |     |     |
| Biomass Burning | 4.9    | 3.3  | 3.1  | 3.1    | 2.6  | 5.6  | 6.3  | 4.8  | 2.1  | 4.8 | 6.6 |
| Fossil          | 3.3    | 6.4  | 4.5  | 2.9    | 1.8  | 3.5  | 3.2  | 4.6  |      |     |     |
| Agriwaste       | 14.5   | 19.9 | 31.9 | 15.6   | 9.5  | 15.0 | 18.9 | 23.8 |      |     |     |
| Other           | 1.3    | 3.8  | 1.8  | 1.8    | 1.5  | 1.2  |      |      |      |     |     |
| Soil            | -0.6 / | -2.1 | -1.4 | -0.3 / |      |      |      |      |      |     |     |

## 372 **II Observations and model descriptions**

### 373 **II.1 Description of atmospheric CH<sub>4</sub> datasets**

#### 374 **NOAA/ESRL (Dlugokencky et al., 2011)**

375 NOAA air samples are collected in pairs, approximately weekly, in 2.5 L borosilicate-glass flasks with  
376 Teflon O-ring sealed stopcocks from sites in NOAA's global cooperative air sampling network<sup>83</sup>.  
377 Flasks are flushed and pressurized to ~1.2 atm with a portable sampler. Methane is measured by gas  
378 chromatography with flame ionization detection against the NOAA 2004 CH<sub>4</sub> standard scale (it is also  
379 the WMO Global Atmosphere Watch CH<sub>4</sub> mole fraction scale)<sup>84</sup> and reported in dry air mole fractions  
380 (nmol mol<sup>-1</sup>, abbreviated ppb). Repeatability of the measurements averages 1.5 ppb (1 s.d.). For this  
381 study, measurements from 46 globally-distributed remote boundary layer sites were fitted with curves  
382 to smooth variability with periods less than ~40 days<sup>83</sup>. Synchronized points were extracted from these  
383 curves at approximately weekly intervals and smoothed as a function of latitude to define an evenly  
384 spaced matrix of surface CH<sub>4</sub> mole fractions as a function of time and latitude (data path:  
385 <ftp://ftp.cmdl.noaa.gov/ccg/ch4/flask/>). This matrix was used to calculate global CH<sub>4</sub> averages.

#### 386 **AGAGE (Rigby et al., 2008)**

387 Global-average GAGE/AGAGE CH<sub>4</sub> mole fractions

388 GAGE CH<sub>4</sub> measurements began between 1985 and 1987 at Adrigole, Ireland, Cape Grim, Tasmania,  
389 Cape Mears, Oregon and Cape Matatula, Samoa<sup>2</sup>. These observations have been ongoing throughout  
390 the GAGE and subsequent AGAGE project, but with a relocation of the Adrigole (Ireland) and Cape  
391 Matatula (California) sites to Mace Head (Ireland) and Trinidad Head (California) respectively, and  
392 the addition of CH<sub>4</sub> measurements to the ALE/GAGE/AGAGE site at Ragged Point (Barbados) in  
393 1996. These locations were chosen to sample the remote atmosphere in four "semi-hemispheres".  
394 Measurements are made using automated gas chromatograph/flame ionization detectors (GC/FID) at  
395 approximately hourly frequency. "Background" concentrations were extracted from the high-

396 frequency measurement time series at each site using a statistical filter<sup>85</sup>. In order to account for data  
397 gaps, global average CH<sub>4</sub> mole fractions were calculated using a 2D model of the atmosphere<sup>86,87,88</sup>,  
398 into which AGAGE observations had been assimilated. CH<sub>4</sub> emissions were estimated in the model in  
399 each semi-hemisphere during each month between 1986 and 2011, using AGAGE observations<sup>37</sup>. The  
400 global averages were then calculated based on the optimized semi-hemispheric model mole fractions.

401

## 402 **CSIRO (Francey et al., 1999)**

403 Sampling:

404 The CSIRO data used in this manuscript have been obtained from flask air samples returned to  
405 GASLAB for analysis. The flasks are of 6 types, 4 of which are the property of CSIRO (items a-d  
406 below) and 2 of which are the property of Environment Canada for air sampling at the Canadian sites,  
407 Alert and Estevan Point (items e and f): (a) glass 0.5 litre, sealed with two stopcocks fitted with PTFE,  
408 PFA or Viton O-rings (flask identifier prefix “G050”), (b) glass 5.0 litre, sealed with two stopcocks  
409 fitted with PTFE O-rings (“G500”), (c) glass 0.8 litre, sealed with two stopcocks fitted with PTFE or  
410 PFA O-rings (“G080”), (d) electropolished stainless steel 1.6 litre “Sirocans” fitted with two stainless  
411 steel valves manufactured by either Nupro or Hoke (“S160”), (e) glass 2.0 litre sealed with a single  
412 stopcock fitted with a Viton O-ring (“F”, “FF”, “FA”, “FE”, “EP”, “ALT”) or (f) glass 2.0 litre sealed  
413 with two stopcocks fitted with Viton O-rings (“M1”, “S”, “P2”, “TEMP”). Experiments carried out to  
414 test for any change in sample CH<sub>4</sub> mixing ratio during storage have shown no drift to within detection  
415 limits over test periods of several months to years<sup>89</sup>. Typical sample storage times range from days to  
416 weeks for some sites (e.g. Cape Grim, Aircraft) to as much as 1 year for Macquarie Island and the  
417 Antarctic sites.

418 The CSIRO sampling sites used in this study are: South Pole, Antarctica (89° 59’S, 24° 48’W, 2810  
419 metres altitude); Mawson, Australian Antarctic Territory (67° 37’S, 62° 52’E, 32 m); Macquarie  
420 Island, Australia (54° 29’S, 158° 58’E, 12 m); Cape Grim, Australia (40° 41’S, 144° 41’E, 94 m);

421 Cape Ferguson, Australia (19° 17'S, 147° 03'E, 2 m); Mauna Loa, Hawaii, USA (19° 32'N, 155°  
422 35'W, 3397 m); Estevan Point, Canada (49° 23'N, 126° 32'W, 39 m); Shetland, Scotland (60° 10'N,  
423 01° 10'W, 30 m); and Alert, Canada (82° 27'N, 62° 31'W, 6 m).

424 Analysis:

425 Samples were analysed by gas chromatography with flame ionisation detection (FID). Three  
426 individual but similarly configured Carle gas chromatographs were used over the length of the record.  
427 Further details are provided elsewhere of CSIRO's global sampling network, sampling and analytical  
428 techniques<sup>26</sup> and measurement uncertainty<sup>90</sup>.

429 Calibration:

430 Data are reported in the NOAA04 CH<sub>4</sub>scale<sup>84</sup>. The link to this scale was established with 8 high  
431 pressure cylinders containing dry, natural air with a CH<sub>4</sub> mole fraction range of 690 - 1870 ppb. These  
432 standards were calibrated by NOAA on one or more occasions between 1987 and 2001. Stability of  
433 the CSIRO scale is monitored with ~25 assorted long-lived standards. Instrument response has been  
434 further evaluated with a suite of six Nippon Sanso CH<sub>4</sub>-in-air standards (volumetrically prepared,  
435 calibrated against a gravimetric scale at Tohoku University) spanning the range 310-1845 ppb. Details  
436 of calibration and measurement uncertainty are given by ref(<sup>90</sup>).

437 Data Processing:

438 Flask data are assigned flags to indicate whether they are classified as retained or rejected. Cause of  
439 rejection falls into three broad categories: (i) the sample is considered to be not representative of the  
440 atmosphere at the time and place of sampling due to identified or inferred sampling or analytical  
441 problems (eg. sample contamination, poor analysis), (ii) the sample is considered to be "non-baseline"  
442 as indicated by the meteorological conditions at the time of sampling and (iii) any remaining outliers  
443 are flagged on the basis of a 3 sigma filter. Only data marked as retained have been used in this  
444 manuscript.



445 **UCI (Simpson et al., 2012)**

446 The University of California, Irvine (UCI) has monitored global CH<sub>4</sub> mixing ratios since 1978<sup>1,27,91,92</sup>.  
447 Each season (March, June, September, December) more than 80 whole air samples are collected over a  
448 3-week period in a latitudinal transect of the Pacific Basin from 71°N (Barrow, AK) to 47°S (Slope  
449 Point, New Zealand), with occasional sampling at more northerly and southerly latitudes. Individual  
450 air samples are collected at sites that our experience has shown to give remote concentrations, usually  
451 along the coast when the wind is arriving from the ocean. A map of the sampling locations for the UCI  
452 network is given in ref<sup>(27)</sup>. Each air sample is collected into a conditioned, evacuated 2 L stainless  
453 steel canister equipped with a bellows valve, over a period of about one minute. The air samples are  
454 returned to our UCI laboratory and analyzed for CH<sub>4</sub> using gas chromatography (HP-5890A) with  
455 flame ionization detection. Other light hydrocarbons and halocarbons are measured from the same air  
456 samples using multi-column gas chromatography. Primary CH<sub>4</sub> calibration standards dating back to  
457 late 1977 ensure that our measurements are internally consistent. The CH<sub>4</sub> mixing ratios are reported  
458 for dry air and are relative to a primary standard purchased from the Matheson Gas Company in 1977,  
459 and to a National Bureau of Standards standard that was purchased in 1982 and has an uncertainty of  
460 ±1% (comparison with a NIST standard), which is our measurement accuracy. Systematic offsets  
461 between networks are regularly quantified and can be corrected when using several international  
462 networks in a modelling work. Our analytical precision, which is determined by alternating  
463 measurements of secondary standards with aliquots from an individual air sample, is currently about 1  
464 ppbv.

465 Each data point is individually inspected, and those that do not represent remote values are removed  
466 from the data set (typically 2–5 samples per season). The remaining samples are used to calculate a  
467 global trace gas mixing ratio for each season of measurements as follows. The earth is divided into 16  
468 latitudinal bands, each with an equal volume of air. The mixing ratios measured in each latitudinal  
469 band are averaged, and the global CH<sub>4</sub> mixing ratio for each season is the mean of the 16 band  
470 averages. Its uncertainty is the sum of standard errors for each band, added in quadrature, divided by

471 16. Because we do not routinely collect air samples in the southernmost two latitudinal bands, their  
472 CH<sub>4</sub> concentrations are inferred from concentrations measured in neighbouring bands in the southern  
473 hemisphere, where CH<sub>4</sub> is well-mixed. The annual global CH<sub>4</sub> mixing ratio is the average of 4  
474 consecutive seasonal means, and its uncertainty is the sum of the standard errors of the seasonal  
475 means, added in quadrature, divided by 4. The annual global growth rate is the difference between two  
476 consecutive annual global CH<sub>4</sub> mixing ratios. Its uncertainty is the sum of the standard errors of the  
477 two annual means from which it was calculated, added in quadrature.

## 478 **II.2 Description of top-down inversions (T-D)**

479 Model main characteristics are summarized in table S1.

### 480 **TM5-4DVAR (Bergamaschi et al., 2009)**

481 Model simulations are based on the TM5-4DVAR inverse modelling system described in detail by  
482 Meirink<sup>93</sup>, including subsequent further developments described by Bergamaschi et al. (2009;  
483 2010)<sup>23,94</sup>. TM5 is an offline transport model<sup>95</sup>, driven by the meteorological fields from the ERA-  
484 INTERIM reanalysis. We employ the standard TM5 version (TM5 cycle 1), with 25 vertical layers,  
485 and apply a horizontal resolution of 6°x4°. The 4-dimensional variational (4DVAR) optimization  
486 technique minimizes iteratively a cost function taking into account an a priori estimate of the  
487 emissions, based on the emission inventories used by Bergamaschi et al. (2010)<sup>94</sup>. Column-averaged  
488 CH<sub>4</sub> mixing ratios from the Scanning Imaging Absorption Spectrometer for Atmospheric Cartography  
489 (SCIAMACHY) instrument<sup>18</sup> onboard ENVISAT are assimilated together with surface observations  
490 from the NOAA Earth System Research Laboratory (ESRL) global cooperative air sampling<sup>3</sup>, which  
491 serve as 'anchor-points' to correct for biases in the satellite retrievals<sup>23</sup>. The CH<sub>4</sub> inversions used in  
492 this paper are from the CH<sub>4</sub> re-analysis over the period 2003-2010 in the framework of the Monitoring  
493 Atmospheric Composition and Climate (MACC) project <http://www.gmes-atmosphere.eu/>.

494 **LMDZ-MIOP (Bousquet et al., 2011)**

495 The LMDZ-MIOP inversion model is an analytical inversion that has been used to infer the sources  
496 and sinks of carbon dioxide<sup>96,97</sup>, methyl-chloroform<sup>98</sup> CH<sub>3</sub>CCl<sub>3</sub>, and recently di-hydrogen<sup>99</sup> H<sub>2</sub>. Briefly,  
497 it solves for monthly surface CH<sub>4</sub> emissions for the different categories of sources and sinks and for 11  
498 large regions (10 land regions + 1 ocean), as described in the TRANSCOM experiment<sup>100</sup>. It uses  
499 monthly mean observations at up to 68 surface stations from the NOAA/ESRL, CSIRO and  
500 IPSL/LSCE surface monitoring networks. The offline version LMDZt version 3 of the LMDZ-GCM,  
501 nudged to analysed winds<sup>101</sup>, is used to model atmospheric transport<sup>102,103</sup>. Prior emissions are taken  
502 from inventories<sup>104-106</sup>. The OH 3-dimensional fields are pre-optimized by an inversion of CH<sub>3</sub>CCl<sub>3</sub>  
503 (MCF) observations as described by Bousquet et al. (2005)<sup>98</sup>. Monthly uncertainties are prescribed for  
504 prior CH<sub>4</sub> emissions of ±150% for each region each month, and for CH<sub>4</sub> observations (from ±5 ppb to  
505 ±50ppb, with a median of ±10 ppb), with no error correlations. A simple filter is also added in the time  
506 domain: changes of the inferred fluxes from one month to the next are limited to ±250% (sources with  
507 a seasonal cycle in the prior data) or to ±50% (sources with no seasonal cycle in the prior data) of the  
508 prior month-to-month differences, according to previous studies<sup>107,108</sup>. This noise filter avoids the  
509 creation of unrealistic large month-to-month flux differences. A more complete description of the  
510 method can be found in Bousquet et al. (2005)<sup>98</sup>. We define a reference inversion scenario based on  
511 these assumptions, complemented by four additional scenarios varying the number of atmospheric  
512 stations (only NOAA/ESRL stations), the OH IAV (OH is maintained constant), the wetland  
513 scenario<sup>109</sup>, and the noise filter (no noise filter used).

514 **CarbonTracker-CH<sub>4</sub> (Bruhwiler et al., 2012)**

515 The global CH<sub>4</sub> assimilation, CarbonTracker-CH<sub>4</sub>, estimates anthropogenic and natural emissions  
516 from 2000 through to the end of 2010. Anthropogenic prior emissions are from the EDGAR  
517 3.2FT2000 dataset and were kept constant over the period of the simulation in order to see whether  
518 trends in emissions would be captured by the assimilation. Prior wetland emissions were taken from  
519 Bergamaschi et al. (2007)<sup>110</sup> and were based on the work by Mathews and Fung (1987)<sup>104</sup>. Natural

520 prior CH<sub>4</sub> sources also included emissions from wildfires using the GFED product<sup>106</sup>, as well as the  
521 global soil uptake<sup>111</sup>. Smaller prior emissions from the oceans, termites and wild animals were also  
522 included. A diagonal prior covariance matrix was assumed with the uncertainty of individual processes  
523 taken to be 75% of the magnitude of each source. To produce flux estimates, CarbonTracker-CH<sub>4</sub> uses  
524 the ensemble Kalman smoother described by Peters et al. (2005)<sup>112</sup>, and the TM5 transport model with  
525 driving meteorology from ECMWF. The estimated parameters are multipliers of the prior flux  
526 estimates at weekly intervals, aggregated to monthly values. Air samples from 88 sites distributed  
527 globally are used to constrain the flux estimates. Most of the sites were located at the surface;  
528 however, at a few sites samples were collected from towers. Aircraft observations were not used, but  
529 instead retained for evaluation. The model-data mismatch errors are difficult to quantify for each site;  
530 however, sites located in the marine boundary layer and deep Southern Hemisphere were given more  
531 weight in the assimilation than continental sites that are more difficult to model due to proximity to  
532 local sources. More details on CarbonTracker-CH<sub>4</sub> are given by Bruhwiler et al. (2011)<sup>64</sup>.

### 533 **GEOS-Chem (Fraser et al., 2013)**

534 GEOS-Chem is a global 3-D chemical transport model (v8-01-01) driven by v5 of the analyzed  
535 meteorological fields from the NASA Global Modeling and Assimilation Office. A comprehensive  
536 description and evaluation of the CH<sub>4</sub> simulation is given by ref<sup>(65,113)</sup>. Here, the model was run at 4x5  
537 resolution with 47 vertical levels. We use prior year-specific emission inventories for anthropogenic  
538 activity (EDGAR 3.2 FT<sup>114</sup>), biomass-burning (GFEDv2<sup>106</sup>), and wetlands and rice<sup>115</sup>; and  
539 climatological seasonal emissions for the ocean<sup>116</sup> and all other natural emissions and the soil sink  
540 (Fung et al, 1991). We use monthly-mean 3-D fields for the tropospheric OH sink generated from the  
541 Ox-NOx-VOC chemistry version of GEOS-Chem<sup>117</sup>. Stratospheric loss rates are adapted from a 2D  
542 stratospheric model<sup>118</sup>. We use an ensemble Kalman filter<sup>119</sup> to estimate surface CH<sub>4</sub> fluxes by fitting  
543 surface measurements (2000-2010) at 48 sites<sup>108</sup> with measurement errors described by Wang et al.  
544 (2004)<sup>118</sup>. We estimate fluxes on an 8-day time step, using a 3.5 month lag window, over 110 regions  
545 defined by subdividing each of the 23 continental TransCom regions into 9 regions<sup>100</sup>. For regions

546 with significant contribution from both seasonal and constant sources (temperate North America,  
547 North Africa, temperate Eurasia, Europe) we estimate seasonal and constant emissions separately,  
548 assigning a prior uncertainty of 50% for land-regions with seasonal emissions and 25% for constant  
549 emissions. For all other regions we estimate all emissions together, with a prior uncertainty of  
550 50%. We report monthly mean fluxes on the original 23 TransCom regions.

### 551 **TM5-4DVAR (Beck et al., 2012)**

552 The TM5-4DVAR inversions make use of the global atmospheric transport model TM5<sup>95</sup>. The off-line  
553 TM5 model is driven by meteorological fields from the ERA-interim reanalysis from ECMWF at a  
554 resolution 6x4 degree (lat x long) and 25 hybrid sigma pressure levels. The optimization algorithm is  
555 based on the variational approach, and uses the conjugate gradients technique for cost function  
556 minimization<sup>93</sup>. The inversion solves for net monthly CH<sub>4</sub> fluxes at the resolution of the transport  
557 model for the period 2003-2010. A priori emissions are taken from the EDGAR4.1 emission inventory  
558 (<http://edgar.jrc.ec.europa.eu>) for anthropogenic fluxes, LPJ-WhyMe<sup>62</sup> for natural wetlands, and  
559 GFED3<sup>34</sup> for biomass-burning, complemented by minor sources<sup>13</sup>. The photochemical removal of CH<sub>4</sub>  
560 is calculated using an MCF calibrated OH climatology<sup>29</sup> and accounts for oxidation by Cl and O<sup>1D</sup>  
561 radicals in the stratosphere<sup>120</sup>. TM5-4DVAR optimizes CH<sub>4</sub> surface fluxes to minimize the misfit with  
562 measurements of the CH<sub>4</sub> dry air mole fraction from 46 sites of the NOAA-ESRL cooperative flask  
563 sampling network<sup>3</sup> and retrievals of vertical column averaged CH<sub>4</sub> from the SCIAMACHY satellite  
564 instrument<sup>18</sup> for the period 2003-2010. Posterior flux estimates per source category are derived from  
565 the optimized grid box totals using the a priori assumed partitioning between the processes per grid  
566 box.

### 567 **LMDZt-SACS (Pison et al., 2009; Bousquet et al., 2011)**

568 We use the variational scheme<sup>121</sup> including the off-line version of the LMDZt (Laboratoire de  
569 Météorologie Dynamique – Zoom) transport model version 4 coupled with the atmospheric chemistry  
570 module SACS (Simplified Atmospheric Chemistry System)<sup>122</sup>. LMDz's grid is 3.75 degrees x 2.5

571 degrees (longitude-latitude) on 19 sigma-pressure levels. The air mass fluxes are pre-computed by the  
572 on-line LMDz version nudged to ECMWF analysis for horizontal winds. SACS represents a simplified  
573 CH<sub>4</sub> oxidation chain that links CH<sub>4</sub> and CO through reactions with hydroxyl radicals (OH) and  
574 formaldehyde (HCHO)<sup>122</sup>; the reaction between OH and methyl-chloroform (MCF, CH<sub>3</sub>CCl<sub>3</sub>) is also  
575 represented as a constraint on OH concentrations. Methane prior inventories are combined from the  
576 Emission Database for Global Atmospheric Research (EDGAR~3) inventory for the year 1995<sup>105</sup> for  
577 anthropogenic emissions, the Global Fire and Emission database (GFED-v2)<sup>106</sup> for monthly biomass-  
578 burning emissions, the study by Fung et al. (1991)<sup>123</sup> for emissions due to wetlands and termites, and a  
579 constant source (total 15 Tg/year) for oceans. MCF emissions are based on the inventory of Montzka  
580 et al. (2000)<sup>124</sup>, rescaled according to an update of the study by Bousquet et al. (2006)<sup>10</sup>. The prior  
581 variances in each grid cell are set at ±100% of the monthly maximum flux over the eight neighbouring  
582 grid cells and the current grid cell<sup>122</sup>). The error correlations of the CH<sub>4</sub> fluxes are optimized using  
583 correlation lengths of 500 km on land and 1000 km on oceans, without time correlations<sup>121</sup>. Daily  
584 mean CH<sub>4</sub> and MCF observations at continuous measurement stations and individual flask  
585 observations at flask stations are assimilated at 66 surface stations from the NOAA/ESRL, CSIRO and  
586 IPSL/LSCE surface monitoring networks. The inversion is run from January 1990 to March 2009. The  
587 relevant cost function and the norm of its gradient (computed by the adjoint) are minimized with the  
588 algorithm M1QN3<sup>125</sup>. The inversion results consist of eight-day maps (7081 cells) of net CH<sub>4</sub>  
589 emission fluxes and four correction coefficients for OH columns (one per latitudinal band 90S-30S;  
590 30S-0, 0-30N, 30N-90N). To compare our results with the other inventories, the total net fluxes are  
591 broken into categories. The global monthly analysis-to-prior ratio is computed and then applied to  
592 each source category used in the prior in each grid cell over the month.

### 593 **MATCH model (Chen & Prinn, 2006)**

594 See Table S1

595 **TM2 model (Hein et al., 1997)**

596 See Table S1

597 **GISS model (Fung et al. 1991)**

598 See Table S1

599

## 600 **II.3 Description of bottom-up studies (B-U)**

601 **LPJ-wsl (Hodson et al, 2011)**

602 The LPJ-wsl CH<sub>4</sub> model output used in this analysis is the same as presented by Hodson et al.,  
603 (2011)<sup>63</sup>. The wetland CH<sub>4</sub> flux E (Tg CH<sub>4</sub> grid cell<sup>-1</sup> month<sup>-1</sup>) at each 0.5° grid cell (x) and monthly  
604 time step (t) is calculated as a linear function of wetland extent (A) and heterotrophic respiration (R<sub>h</sub>)  
605 according to the following equation:

$$606 \quad E(x,t) = R_h(x,t)A(x,t)\beta F(x) \quad (1)$$

607 R<sub>h</sub> is calculated using the LPJ-wsl dynamic global vegetation model (DGVM), based on the LPJv3.1  
608 DGVM<sup>126,127</sup>. The monthly climatology inputs (precipitation, mean temperature, cloud cover, wet  
609 days) and the non-gridded annual CO<sub>2</sub> concentration inputs to LPJ-wsl are described by Hodson et al.  
610 (2011). In addition, we prescribed<sup>63</sup> soil texture from the Food and Agriculture Organization<sup>128</sup>, using  
611 a 2-soil layer hydrological model with a total soil depth of 1.5 metres. A 1000-year spin up was  
612 implemented by recycling the first 30 years of climate data (1901-1930) with pre-industrial CO<sub>2</sub>  
613 concentrations to equilibrate soil and vegetation carbon pools, followed by a transient simulation  
614 running from 1901-2005.

615 Wetland extent (A) represents natural wetland area and lakes only and is a monthly-varying combined  
616 model and satellite product at 0.5° x 0.5° spatial resolution<sup>63</sup>.

617 The scaling ratio  $\beta F$  converts C to CH<sub>4</sub> fluxes and is a combination of two scaling factors, one for  
618 tropical (TR) and one for boreal (B) wetland conditions, which allows the model to account for broad  
619 ecosystem differences in CH<sub>4</sub> emitting capacity between wetland types (Eqn. 2). The fraction of  
620 wetland type found in each grid cell is calculated based on surface temperature (Eqn. 3).

$$621 \quad \beta F = \sigma F_{\text{TR}} + (1 - \sigma) F_{\text{B}} \quad (2)$$

$$622 \quad \sigma = \exp((T(x) - T_{\text{max}})/8) \quad (3)$$

623 where T is the mean near-surface temperature between 1960–1990, and  $T_{\text{max}} = 303.35$  K.  $F_{\text{TR}}$  and  $F_{\text{B}}$   
624 were fit to match regional estimates of wetland CH<sub>4</sub> fluxes for the Hudson Bay lowlands and the  
625 central Amazon Basin as described by Hodson et al. (2011).

## 626 **ORCHIDEE (Ringeval et al., 2011)**

627 The ORCHIDEE model<sup>129</sup> has been implemented with a wetland CH<sub>4</sub> emissions scheme. Such an  
628 ORCHIDEE version has been used for various studies on different time-scales<sup>61,130</sup>. The model  
629 explicitly represents both the mechanisms leading to CH<sub>4</sub> flux at the atmosphere/soil interface and the  
630 dynamic wetland extent. Basically, the wetland CH<sub>4</sub> emissions  $E_{\text{CH}_4}(g,t)$  are computed in ORCHIDEE-  
631 WET for each grid-cell  $g$  and for each time-step  $t$  through the following equation:

$$632 \quad E_{\text{CH}_4}(g,t) = \sum_{\text{WTD}_i} (S_{\text{WTD}_i}(g,t) \cdot D_{\text{WTD}_i}(g,t))$$

633 Where  $S_{\text{WTD}_i}$  is the fraction of  $g$  covered by a wetland where the water table depth is equal to  $\text{WTD}_i$   
634 and  $D_{\text{WTD}_i}$  is the CH<sub>4</sub> flux density (i.e. g CH<sub>4</sub> per m<sup>2</sup> per unit time) for a wetland where the water table  
635 depth is equal to  $\text{WTD}_i$ . Here, the  $\text{WTD}_i$  values for each grid-cell are taken as: 0, -3 and -6cm.  $S_{\text{WTD}_i}$   
636 and  $D_{\text{WTD}_i}$  are respectively computed by (i) the coupling between a TOPMODEL approach and  
637 ORCHIDEE<sup>131</sup> and (ii) the coupling between a slight modification of the Walter model<sup>132</sup> and  
638 ORCHIDEE<sup>130</sup>. As in a previous version<sup>61</sup>, the wetland extent is corrected to subtract the systematic  
639 biases of the model using a mean climatology of the remote sensing data of inundation extent<sup>133</sup>.  
640 Moreover, in the present study, two ORCHIDEE estimates are given in which the seasonal cycle of the



641 wetland extent is either prescribed (ORCHIDEE-P07) or computed (ORCHIDEE-TOP). In both  
642 estimates, the IAV of the wetland extent is computed.

### 643 **LPJ-WhyMe (Spahni et al., 2011)**

644 Global CH<sub>4</sub> emissions and sinks have been estimated with the B-U approach using the LPJ-WhyMe  
645 dynamic global vegetation model<sup>62</sup>. The model was forced by the CRU-NCEP climate data set<sup>134</sup> and  
646 run over the period of 1990-2009. The model runs were performed for four wetland source types of  
647 atmospheric CH<sub>4</sub> (northern high latitude peatlands, tropical and subtropical inundated wetlands, global  
648 rice paddies and global wet mineral soils) and the global CH<sub>4</sub> soil sink. For peatlands, inundated  
649 wetlands and rice paddies the fractional emission area was prescribed according to IGBP-DIS soil  
650 carbon map (Global Soil Data Task Group, 2000), inundation map<sup>135</sup>, and fractional rice cover map<sup>136</sup>,  
651 respectively. Areas were treated to be conformal (Spahni et al., 2011) and the non-inundated fractional  
652 area of mineral soils could be a CH<sub>4</sub> source or a sink depending on soil moisture content as calculated  
653 by the LPJ-WhyMe hydrology<sup>62</sup>. CH<sub>4</sub> emission fluxes per unit area were calculated as being  
654 proportional to the model's soil carbon respiration, differentially for each emission and sink type. The  
655 global scaling parameters were calibrated by a T-D optimization of the global budget using the TM5  
656 atmospheric chemistry and transport model on the basis of monthly fluxes in 2004<sup>62</sup>.

### 657 **GICC (Mieville et al., 2010)**

658 The Global Inventory for Chemistry-Climate studies (GICC)<sup>69</sup> gridded decadal (for the 1980s and  
659 1990s) and yearly (1997-2005) biomass burning emission fields were downloaded from the ECCAD  
660 portal (<http://eccad.sedoo.fr>, date of access: 14 November, 2011).

### 661 **RETRO (Schultz et al., 2007)**

662 Yearly gridded emission data sets from the Reanalysis of the TROpospheric chemical composition  
663 over the last 40 years project (RETRO)<sup>67</sup> for the period 1980-2000 were downloaded from  
664 <ftp://ftp.retro.enes.org/pub/emissions/ch4/>.

665 **GFEDv2 (Van der Werf et al., 2004)**

666 The Global Fire Emission Database version 2 (GFEDv2)<sup>68</sup> gridded monthly biomass burning emission  
667 fields for the period 1997-2008 were downloaded from the ECCAD portal (<http://eccad.sedoo.fr>, date  
668 of access: 30 January, 2012).

669 **GFEDv3 (Van der Werf et al., 2010)**

670 The Global Fire Emission Database version 3 (GFEDv3)<sup>34</sup> gridded monthly biomass burning emission  
671 fields for the period 1997-2009 were downloaded from  
672 <http://www.falw.vu/~gwerf/GFED/GFED3/emissions/> (date of access: 20 July 2011).

673 **FINNv1 (Wiedinmyer et al., 2011)**

674 The Fire Inventory from NCAR (FINNv1)<sup>70</sup> gridded emission fields were gathered by Christine  
675 Wiedinmyer and downloaded from the ftp server (date of access: 3 January 2012).

676 **IIASA (Dentener et al., 2005)**

677 IIASA CH<sub>4</sub> data for the 1990's and 2000s and the fossil fuel, agriculture/waste and biomass burning  
678 categories<sup>137</sup> were downloaded from [http://www.iiasa.ac.at/rains/global\\_emiss/global\\_emiss.html](http://www.iiasa.ac.at/rains/global_emiss/global_emiss.html) (date  
679 of access: 7 November 2011).

680 **EPA, 2011**

681 EPA<sup>138,139</sup> CH<sub>4</sub> data for the 1990's and 2000s and the fossil fuel and agriculture/waste categories were  
682 downloaded from [http://www.epa.gov/climatechange/economics/downloads/Data%20Annexes%20-  
683 %202012.zip](http://www.epa.gov/climatechange/economics/downloads/Data%20Annexes%20-%202012.zip) (date of access: 14 November 2011).

684 **EDGARv4.1 (EDGAR4.1, 2009)**

685 EDGARv4.1<sup>140</sup> gridded emission fields for anthropogenic fluxes were downloaded from the EDGAR  
686 website ([http://edgar.jrc.ec.europa.eu/datasets\\_grid\\_list41.php#](http://edgar.jrc.ec.europa.eu/datasets_grid_list41.php#), date of access: 26 August, 2011).

687 **EDGARv4.2 (EDGAR4.2, 2011)**

688 EDGARv4.2<sup>140</sup> gridded emission fields for anthropogenic fluxes were downloaded from the EDGAR  
689 website ([http://edgar.jrc.ec.europa.eu/datasets\\_list.php?v=42&edgar\\_compound=CH4](http://edgar.jrc.ec.europa.eu/datasets_list.php?v=42&edgar_compound=CH4), date of access:  
690 20, November 2012).

691 **Description of models contributing to the Atmospheric Chemistry and Climate**  
692 **Model Intercomparison Project (ACCMIP, Lamarque et al., 2013; Voulgarakis et**  
693 **al., 2013; Naik et al., 2013)**

694 The Atmospheric Chemistry and Climate Model Intercomparison Project (ACCMIP)<sup>141,142,152</sup>  
695 (<http://www.giss.nasa.gov/projects/accmip/>) consists of a series of timeslice experiments targeting the  
696 long-term changes in atmospheric composition between 1850 and 2100, with the goal of documenting  
697 radiative forcing and the associated composition changes. Methane chemical destruction due to OH  
698 from 9 of the 12 ACCMIP models is included in this study. All the models are run as coupled  
699 chemistry-climate models (CCMs), driven by monthly mean sea-surface temperatures and sea-ice  
700 coverage either from observations or from the corresponding coupled ocean-atmosphere model  
701 integrations submitted to the Coupled Model Intercomparison Project Phase 5 (CMIP5). All details  
702 about model specifications and performed simulations can be found in the related publications<sup>142,143</sup>.

703 In most models, CH<sub>4</sub> concentration was prescribed at the surface using the historical reconstruction but  
704 was allowed to undergo chemical processing in the rest of the atmosphere. In LMDzORINCA surface  
705 CH<sub>4</sub> emissions were specified following ref<sup>(144)</sup>, while UM-CAM used a globally constant  
706 concentration. In all models, CH<sub>4</sub> varies between different timeslices. Ozone photolysis is the primary  
707 source of hydroxyl radicals (OH), the main sink for CH<sub>4</sub>, in the troposphere. CESM-CAM-superfast,  
708 CMAM, GFDL-AM3<sup>145</sup>, LMDzORINCA, MIROC-CHEM, NCAR-CAM3.5, and UM-CAM  
709 employed a lookup table approach wherein calculated clear-sky photolysis frequencies are adjusted for  
710 modelled clouds, overhead ozone column, and surface albedo. The GEOSCCM, and GISS-E2-R  
711 models used versions of the Fast-J scheme<sup>146</sup>, which calculates photolysis frequencies online

712 accounting for modelled clouds, overhead ozone column, surface albedo and aerosols. Overhead  
713 stratospheric ozone column determines the level of incoming ultraviolet radiation, important for the  
714 formation of tropospheric OH radicals. Six of the nine models simulated full stratospheric chemistry.  
715 Stratospheric ozone concentrations in the UM-CAM and LMDzORINCA were prescribed from a  
716 database<sup>147</sup> developed in support of CMIP5 and a climatology<sup>148</sup>, respectively. In CESM-CAM-  
717 superfast, a simplified “linearized ozone chemistry” (LINOZ) scheme was used.

718 We used data from the 1980 and 2000 timeslices simulated within the ACCMIP intercomparison,  
719 representing the CH<sub>4</sub> chemical loss for the years around 1980 and 2000. This provides estimates of  
720 CH<sub>4</sub> loss due to OH for the 1980s and the 2000s, two of the decades we are interested in. Only two of  
721 the models, LMDzORINCA and GISS-E2-R, provided a full year-to-year dataset from transient  
722 simulations for all three decades. Since no model simulated a 1990 timeslice, we only used those two  
723 models to estimate CH<sub>4</sub> chemical loss for the 1990s. This explains why we get fewer estimates in the  
724 1990s than in the 1980s and the 2000s (Fig. 2).

### 725 **TM5 full chemistry model (Williams et al., 2012; Huijnen et al., 2010)**

726 Forward simulations using the TM5 chemistry-transport model in full chemistry mode and relaxation  
727 to CH<sub>4</sub> surface concentrations provide information on the global sink term. Information on CH<sub>4</sub>  
728 emissions is obtained following a semi-inverse approach<sup>149</sup>. Forward simulations using TM5 and  
729 including CH<sub>4</sub> emissions<sup>62</sup> and latest anthropogenic emission inventories<sup>140</sup> provide information on the  
730 3D time evolution of the OH field. The full chemistry simulations are performed on 3x2 degrees  
731 (longitude x latitude) grid and 34 sigma-pressure vertical levels. The calculated CH<sub>4</sub> losses for the  
732 years 2000-2009 are given for the TM5 model version referenced in refs (<sup>150,151</sup>).

733

734 **III References**

735

736 1 Blake, D. R. *et al.* Global Increase in Atmospheric Methane Concentrations between 1978 and  
737 1980. *Geophys. Res. Lett.* **9**, 477-480 (1982).

738 2 Cunnold, D. M. *et al.* In situ measurements of atmospheric methane at GAGE/AGAGE sites  
739 during 1985-2000 and resulting source inferences. *J. Geophys. Res.-atmos.* **107**, ACH 20-21-ACH 20-  
740 18, doi:10.1029/2001jd001226 (2002).

741 3 Dlugokencky, E. J. *et al.* Observational constraints on recent increases in the atmospheric CH  
742 burden, . *Geophys. Res. Lett.*, **36**, L18803, doi:doi:10.1029/2009GL039780. (2009).

743 4 Francey, R. J. *et al.* Atmospheric carbon dioxide and its stable isotope ratios, methane, carbon  
744 monoxide, nitrous oxide and hydrogen from Shetland Isles. *Atmos. Environ.* **32**, 3331-3338 (1998).

745 5 Brenninkmeijer, C. A. M. *et al.* Civil Aircraft for the regular investigation of the atmosphere  
746 based on an instrumented container: The new CARIBIC system. *Atmos. Chem. Phys.* **7**, 4953-4976,  
747 doi:10.5194/acp-7-4953-2007 (2007).

748 6 Wecht, K. J. *et al.* Validation of TES methane with HIPPO aircraft observations: implications  
749 for inverse modeling of methane sources. *Atmos. Chem. Phys.* **12**, 1823-1832, doi:10.5194/acp-12-  
750 1823-2012 (2012).

751 7 WMO. *WMO World Data Centre for Greenhouse Gases*,  
752 <<http://ds.data.jma.go.jp/gmd/wdcgg/introduction.html>> (2012).

753 8 Sussmann, R., Forster, F., Rettinger, M. & Bousquet, P. Renewed methane increase for five  
754 years (2007,Äi2011) observed by solar FTIR spectrometry. *Atmos. Chem. Phys.* **12**, 4885-4891,  
755 doi:10.5194/acp-12-4885-2012 (2012).

756 9 Wunch, D. *et al.* The Total Carbon Column Observing Network, . *Phil. Trans. R. Soc. A*, **369**,  
757 doi: 10.1098/rsta.2010.0240 (2011).

758 10 Bousquet, P. *et al.* Contribution of anthropogenic and natural sources to atmospheric methane  
759 variability. *Nature* **443**, 439-443 (2006).

760 11 Fisher, R. E. *et al.* Arctic methane sources: Isotopic evidence for atmospheric inputs. *Geophys.*  
761 *Res. Lett.* **38**, L21803, doi:10.1029/2011gl049319 (2011).

762 12 Mikaloff Fletcher, S. E. M., Tans, P. P., Bruhwiler, L. M., Miller, J. B. & Heimann, M. CH4  
763 sources estimated from atmospheric observations of CH4 and its C-13/C-12 isotopic ratios: 1. Inverse  
764 modeling of source processes. *Global. Biogeochem. Cycles* **18**, GB4004,  
765 doi:4010.1029/2004GB002223 (2004).

766 13 Monteil, G. *et al.* Interpreting methane variations in the past two decades using measurements  
767 of CH(4) mixing ratio and isotopic composition. *Atmos Chem Phys* **11**, 9141-9153 (2011).

- 768 14 Neef, L., van Weele, M. & van Velthoven, P. Optimal estimation of the present-day global  
769 methane budget. *Global. Biogeochem. Cycles* **24** (2010).
- 770 15 Wahlen, M. The Global Methane Cycle. *Annual Review of Earth and Planetary Sciences* **21**,  
771 407-426, doi:doi:10.1146/annurev.ea.21.050193.002203 (1993).
- 772 16 Lassey, K. R., Lowe, D. C. & Smith, A. M. The atmospheric cycling of radiomethane and the  
773 "fossil fraction" of the methane source. *Atmos Chem Phys* **7**, 2141-2149 (2007).
- 774 17 Crevoisier, C. *et al.* First year of upper tropospheric integrated content of CO(2) from IASI  
775 hyperspectral infrared observations. *Atmos Chem Phys* **9**, 4797-4810 (2009).
- 776 18 Frankenberg, C. *et al.* Global column-averaged methane mixing ratios from 2003 to 2009 as  
777 derived from SCIAMACHY: Trends and variability. *J. Geophys. Res.-atmos.* **116**, D04302,  
778 doi:10.1029/2010jd014849 (2011).
- 779 19 Morino, I. *et al.* Preliminary validation of column-averaged volume mixing ratios of carbon  
780 dioxide and methane retrieved from GOSAT short-wavelength infrared spectra. *Atmos Meas Tech* **4**,  
781 1061-1076 (2011).
- 782 20 Butz, A. *et al.* Toward accurate CO(2) and CH(4) observations from GOSAT. *Geophys. Res.*  
783 *Lett.* **38**, L14812, doi:10.1029/2011gl047888 (2011).
- 784 21 Parker, R. *et al.* Methane observations from the Greenhouse Gases Observing SATellite:  
785 Comparison to ground-based TCCON data and model calculations. *Geophys. Res. Lett.* **38**, L15807,  
786 doi:10.1029/2011gl047871 (2011).
- 787 22 Frankenberg, C. *et al.* Satellite cartography of atmospheric methane from SCIAMACHY on  
788 board ENVISAT: Analysis of the years 2003 and 2004. *J. Geophys. Res.-atmos.* **111**, D07303,  
789 doi:DOI: 10.1029/2005JD006235 (2006).
- 790 23 Bergamaschi, P. *et al.* Inverse modeling of global and regional CH<sub>4</sub> emissions using  
791 SCIAMACHY satellite retrievals. *J. Geophys. Res.-atmos.* **114**, doi:10.1029/2009JD012287 (2009).
- 792 24 Dlugokencky, E. J., Nisbet, E. G., Fisher, R. & Lowry, D. Global atmospheric methane:  
793 budget, changes and dangers. *Philos T R Soc A* **369**, 2058-2072 (2011).
- 794 25 Rigby, M. *et al.* Renewed growth of atmospheric methane. *Geophys. Res. Lett.* **35**, - (2008).
- 795 26 Francey, R. J., Steele, L. P., Langenfelds, R. L. & Pak, B. C. High precision long-term  
796 monitoring of radiatively active and related trace gases at surface sites and from aircraft in the  
797 southern hemisphere atmosphere. *J Atmos Sci* **56**, 279-285 (1999).
- 798 27 Simpson, I. J. *et al.* Long-term decline of global atmospheric ethane concentrations and  
799 implications for methane. *Nature* **488**, 490-494,  
800 doi:<http://www.nature.com/nature/journal/v488/n7412/abs/nature11342.html> (2012).

801 28 Thoning, K. W., Tans, P. P. & Komhyr, W. D. Atmospheric carbon dioxide at Mauna Loa  
802 Observatory. 2. Analysis of the NOAA GMCC data, 1974,1985. *J. Geophys. Res.* **94**, 8549-8565  
803 (1989).

804 29 Montzka, S. A. *et al.* Small Interannual Variability of Global Atmospheric Hydroxyl. *Science*  
805 **331**, 67-69 (2011).

806 30 Dlugokencky, E. J. *et al.* Changes in CH<sub>4</sub> and CO growth rates after the eruption of Mt  
807 Pinatubo and their link with changes in tropical tropospheric UV flux. *Geophys. Res. Lett.* **23**, 2761-  
808 2764 (1996).

809 31 Chen, Y. H. & Prinn, R. G. Estimation of atmospheric methane emissions between 1996 and  
810 2001 using a three-dimensional global chemical transport model. *J. Geophys. Res.-atmos.* **111**,  
811 doi:10.1029/2005JD006058 (2006).

812 32 Dlugokencky, E. J. *et al.* Atmospheric methane levels off: Temporary pause or a new steady-  
813 state? *Geophys. Res. Lett.* **30**, 1992, doi:10.1029/2003GL018126, doi:<ftp://ftp.cmdl.noaa.gov/ccg>  
814 (2003).

815 33 Langenfelds, R. L. *et al.* Interannual growth rate variations of atmospheric CO<sub>2</sub> and its delta  
816 C-13, H-2, CH<sub>4</sub>, and CO between 1992 and 1999 linked to biomass burning. *Global. Biogeochem.*  
817 *Cycles* **16**, 1048, doi: doi:10.1029/2001GB001466 (2002).

818 34 van der Werf, G. R. *et al.* Global fire emissions and the contribution of deforestation, savanna,  
819 forest, agricultural, and peat fires (1997-2009). *Atmos Chem Phys* **10**, 11707-11735 (2010).

820 35 Prinn, R. G. *et al.* Evidence for variability of atmospheric hydroxyl radicals over the past  
821 quarter century. *Geophys. Res. Lett.* **32**, L07809, doi:07810.01029/02004GL022228 (2005).

822 36 Bousquet, P. *et al.* Source attribution of the changes in atmospheric methane for 2006-2008.  
823 *Atmos Chem Phys* **11**, 3689-3700 (2011).

824 37 Rigby, M. *et al.* Renewed growth of atmospheric methane. *Geophys. Res. Lett.* **35**, L22805,  
825 doi:10.1029/2008gl036037 (2008).

826 38 Sanderson, M. G. Biomass of termites and their emissions of methane and carbon dioxide: A  
827 global database. *Global Biogeochem. Cycles* **10**, 543-557, doi:10.1029/96gb01893 (1996).

828 39 Sugimoto, A., Inoue, T., Kirtibutr, N. & Abe, T. Methane oxidation by termite mounds  
829 estimated by the carbon isotopic composition of methane. *Global Biogeochem. Cycles* **12**, 595-605,  
830 doi:10.1029/98gb02266 (1998).

831 40 Bignell, D. E., Eggleton, P., Nunes, L. & Thomas, K. L. in *Forests and Insects* (ed N.E.  
832 Stork and M.D. Hunter (Editors) A.D. Watt) 109-134 (Chapman and Hall, 1997).

833 41 Jung, M., Reichstein, M. & Bondeau, A. Towards global empirical upscaling of FLUXNET  
834 eddy covariance observations: validation of a model tree ensemble approach using a biosphere model.  
835 *Biogeosciences* **6**, 2001-2013, doi:10.5194/bg-6-2001-2009 (2009).

836 42 Jung, M. *et al.* Global patterns of land-atmosphere fluxes of carbon dioxide, latent heat, and  
837 sensible heat derived from eddy covariance, satellite, and meteorological observations. *J. Geophys.*  
838 *Res.* **116**, G00J07, doi:10.1029/2010jg001566 (2011).

839 43 Ramankutty, N. & Foley, J. A. Estimating historical changes in global land cover: Croplands  
840 from 1700 to 1992. *Global Biogeochem. Cycles* **13**, 997-1027, doi:10.1029/1999gb900046 (1999).

841 44 Attignon, S. E., Lachat, T., Sinsin, B., Nagel, P. & Peveling, R. Termite assemblages in a  
842 West-African semi-deciduous forest and teak plantations *Agr. Ecosys. Environ.* **110**, 318–326 (2005).

843 45 Jones, D. T. *et al.* Termite assemblage collapse along a land-use intensification gradient in  
844 lowland central Sumatra, Indonesia, . *J. Appl. Ecol.* **40**, 380–391 (2003).

845 46 Kagezi, G. H. *et al.* Decomposition of tissue baits and termite density along a gradient of  
846 human land-use intensification in Western Kenya, *Afr. J. Ecol.* **49**, 267–276 (2011).

847 47 Rahman, P. M., Varma, R.V., Sileshi, G.W.: . Abundance and diversity of soil invertebrates in  
848 annual crops, agroforestry and forest ecosystems in the Nilgiri biosphere reserve of Western Ghats,  
849 India, . *Agroforest Syst.* , DOI 10.1007/s10457-10011-19386-10453, doi:DOI 10.1007/s10457-011-  
850 9386-3 (2011).

851 48 Abensperg-Traun, M. & de Boer, E. S. Species abundances and habitat differences in biomass  
852 of subterranean termites (isoptera) in the wheatbelt of western Australia. *Aust. J. Ecol.* **15**, 219-226  
853 (1990).

854 49 Martius, C. *et al.* Methane emission from wood- feeding termites in Amazonia. *Chemosphere*  
855 **26**, 623-632 (1993).

856 50 Macdonald, J. A., Eggleton, P., Bignell, D. E., Forzi, F. & Fowler, D. Methane emission by  
857 termites and oxidation by soils, across a forest disturbance gradient in the Mbalmayo Forest Reserve,  
858 Cameroon. *Glob. Change Biol.* **4**, 409-418 (1998).

859 51 Macdonald, J. A. *et al.* The effect of termite biomass and anthropogenic disturbance on the  
860 CH<sub>4</sub> budgets of tropical forests in Cameroon and Borneo. *Glob. Change Biol.* **5**, 869-879. (1999).

861 52 Fraser, P. J., Rasmussen, R. A., Creffield, J. W., French, J. R. & Khalil, M. A. K. Termites and  
862 global methane – another assessment. *J. Atmos. Chem.*, **4**, 295-310 (1986).

863 53 Keppler, F., Hamilton, J. T. G., Brass, M. & Rockmann, T. Methane emissions from  
864 terrestrial plants under aerobic conditions. *Nature* **439**, 187-191 (2006).

865 54 Frankenberg, C., Meirink, J. F., van Weele, M., Platt, U. & Wagner, T. Assessing methane  
866 emissions from global space-borne observations. *Science* **308**, 1010-1014 (2005).

867 55 Frankenberg, C. *et al.* Tropical methane emissions: A revised view from SCIAMACHY  
868 onboard ENVISAT. *Geophys. Res. Lett.* **35**, L15811, doi:doi:10.1029/2008GL034300 (2008).

869 56 Dueck, T. A. *et al.* No evidence for substantial aerobic methane emission by terrestrial plants:  
870 a <sup>13</sup>C-labelling approach,. *New Phytologist* **10.1111/j.1469-8137.2007.02103.x.** (2007).



871 57 Nisbet, R. E. R. *et al.* Emission of methane from plants. *P Roy Soc B-Biol Sci* **276**, 1347-1354  
872 (2009).

873 58 Vigano, I. *et al.* Effect of UV radiation and temperature on the emission of methane from plant  
874 biomass and structural components. *Biogeosciences* **5**, 937-947 (2008).

875 59 Bloom, A. A. *et al.* Global methane emission estimates from ultraviolet irradiation of  
876 terrestrial plant foliage. *New Phytologist* doi:10.1111/j.1469-8137.2010.03259.x (2010).

877 60 Houweling, S., van der Werf, G. R., Goldewijk, K. K., Rockmann, T. & Aben, I. Early  
878 anthropogenic CH<sub>4</sub> emissions and the variation of CH<sub>4</sub> and (CH<sub>4</sub>)-C-13 over the last millennium.  
879 *Global. Biogeochem. Cycles* **22**, - (2008).

880 61 Ringeval, B. *et al.* Climate-CH<sub>4</sub> feedback from wetlands and its interaction with the climate-  
881 CO<sub>2</sub> feedback. *Biogeosciences* **8**, 2137-2157 (2011).

882 62 Spahni, R. *et al.* Constraining global methane emissions and uptake by ecosystems.  
883 *Biogeosciences* **8**, 1643-1665, doi:10.5194/bg-8-1643-2011 (2011).

884 63 Hodson, E. L., Poulter, B., Zimmermann, N. E., Prigent, C. & Kaplan, J. O. The El Niño  
885 Southern Oscillation and wetland methane interannual variability. *Geophys. Res. Lett.* **38**, L08810,  
886 doi:10.1029/2011gl046861 (2011).

887 64 Bruhwiler, L., Dlugokencky, E. J. & Masarie, K. in *AGU Fall Meeting* Vol. Abstract B11G-01  
888 (San Francisco, Calif., , 2011).

889 65 Fraser, A. *et al.* Estimating regional methane surface fluxes: the relative importance of surface  
890 and GOSAT mole fraction measurements. *Atmos. Chem. Phys.* **13**, 5697-5713, doi:10.5194/acp-13-  
891 5697-2013 (2013).

892 66 Beck, V. *et al.* Methane airborne measurements and comparison to global models during  
893 BARCA. *Journal of Geophysical Research: Atmospheres* **117**, D15310, doi:10.1029/2011jd017345  
894 (2012).

895 67 Schultz, M. G. *et al.* Emission data sets and methodologies for estimating emissions.,  
896 (Hamburg., 2007).

897 68 van der Werf, G. R. *et al.* Continental-scale partitioning of fire emissions during the 1997 to  
898 2001 El Nino/La Nina period. *Science* **303**, 73-76 (2004).

899 69 Mieville, A. *et al.* Emissions of gases and particles from biomass burning during the 20th  
900 century using satellite data and an historical reconstruction. *Atmos. Environ.* **44**, 1469-1477,  
901 doi:10.1016/j.atmosenv.2010.01.011 (2010).

902 70 Wiedinmyer, C. *et al.* The Fire INventory from NCAR (FINN): a high resolution global model  
903 to estimate the emissions from open burning. *Geosci Model Dev* **4**, 625-641 (2011).

904 71 Beer, C. *et al.* Terrestrial Gross Carbon Dioxide Uptake: Global Distribution and Covariation  
905 with Climate. *Science* **329**, 834-838, doi:10.1126/science.1184984 (2010).

- 906 72 Kanniah, K. D., Beringer, J. & Hutley, L. B. Environmental controls on the spatial variability  
907 of savanna productivity in the Northern Territory Australia. *Agr. Forest Meteorol.* **151**, 1429– 1439  
908 (2011).
- 909 73 Maldague, M. E. in *Trans. 8th Int. Congr. Soil Sci.*, . (eds C. Martius, R. Wassmann, & U.  
910 Thein) 743-751.
- 911 74 Lepage, M. *Les termites d'une savane sahélienne (Ferlo Septentrional, Sénégal): peuplement,*  
912 *populations, consommation, rôle dans l'écosystème*, Univ. of Djion, , (1974).
- 913 75 Ohiagu, C. E. Nest and soil populations of Trinervitermes spp. with particular reference to T.  
914 geminatus (Wasmann), (Isoptera), in Southern Guinea savanna near Mokwa, Nigeria, . *Oecologia* **40**,  
915 167-178 (1978).
- 916 76 Wood, T. G., Johnson, R. A. & Ohiagu, C. E. Populations of termites (Isoptera) in natural and  
917 agriculturalecosystems in Southern Guinea savanna near Mokwa, Nigeria. *Geo. Eco. Trop.* **1**, 139-148  
918 (1977).
- 919 77 Abe, T. & Matsumoto, T. Studies on the distribution and ecological role of termites in a  
920 lowland rain forest of west Malaysia, 3, Distribution and abundance of termites in Pasoh forest  
921 reserve. *Jpn. J. Ecol.* **29**, 337-351 (1979).
- 922 78 Ferrar, P. Termites of a south African savanna, I, List of species and subhabitat preferences.  
923 *Oecologia* **52**, 125-132 (1982).
- 924 79 Ferrar, P. Termites of a south African savanna, IV, Subterranean populations, mass  
925 determination and biomass estimations. *Oecologia*  
926 **52**, 147-151 (1982).
- 927 80 Wood, T. G., Johnson, R. A., Bacchus, S., Shittu, M. O. & Anderson, J. M. Abundance and  
928 distribution of termites (Isoptera) in a riparian forest in the Southern Guinea savanna zone of Nigeria.  
929 *Biotropica* **14**, 25–39 (1982).
- 930 81 Holt, J. A. & Easey, J. F. Numbers and biomass of mound-building termites (isopteran) in a  
931 semi-arid tropical woodland near Charters Towers, north Queensland, Australia. *Sociobiolog* **21**, 281-  
932 286 (1993).
- 933 82 Inoue, T. *et al.* The abundance and biomass of subterranean termites (Isoptera) in a dry  
934 evergreen forest of northeast Thailand. *Sociobiology* **37**, 41-52 (2000).
- 935 83 Dlugokencky, E. J., Steele, L. P., Lang, P. M. & Masarie, K. A. The Growth-Rate and  
936 Distribution of Atmospheric Methane. *J. Geophys. Res.-atmos.* **99**, 17021-17043 (1994).
- 937 84 Dlugokencky, E. J. *et al.* Conversion of NOAA atmospheric dry air CH<sub>4</sub> mole fractions to a  
938 gravimetrically prepared standard scale. *J. Geophys. Res.*, **110**, doi:10.1029/2005JD006035. (2005).

939 85 O'doherty, S. *et al.* In situ chloroform measurements at Advanced Global Atmospheric Gases  
940 Experiment atmospheric research stations from 1994 to 1998. *J. Geophys. Res.-atmos.* **106**, 20429-  
941 20444 (2001).

942 86 Cunnold, D. M. *et al.* The Atmospheric Lifetime Experiment .3. Lifetime Methodology and  
943 Application to 3 Years of Cfc13 Data. *J Geophys Res-Oc Atm* **88**, 8379-8400 (1983).

944 87 Cunnold, D. M. *et al.* Global Trends and Annual Releases of Ccl3f and Ccl2f2 Estimated from  
945 Ale/Gage and Other Measurements from July 1978 to June 1991. *J. Geophys. Res.-atmos.* **99**, 1107-  
946 1126 (1994).

947 88 Rigby, M. *et al.* Re-evaluation of the lifetimes of the major CFCs and CH<sub>3</sub>CCl<sub>3</sub> using  
948 atmospheric trends. *Atmos. Chem. Phys.* **13**, 2691-2702, doi:10.5194/acp-13-2691-2013 (2013).

949 89 Cooper, L. N., Steele, L. P., Langenfelds, R. L., Spencer, D. A. & P., L. M. Atmospheric  
950 methane, carbon dioxide, hydrogen, carbon monoxide and nitrous oxide from Cape Grim flask air  
951 samples analysed by gas chromatography. . 98pp (Bureau of Meteorology and CSIRO Atmospheric  
952 Research, Melbourne, 1999).

953 90 Francey, R. J. & Steele, L. P. Measuring atmospheric carbon dioxide - the calibration  
954 challenge. *Accredit Qual Assur* **8**, 200-204 (2003).

955 91 Simpson, I. J., Blake, D. R., Rowland, F. S. & Chen, T. Y. Implications of the recent  
956 fluctuations in the growth rate of tropospheric methane. *Geophys. Res. Lett.* **29** (2002).

957 92 Simpson, I. J., Rowland, F. S., Meinardi, S. & Blake, D. R. Influence of biomass burning  
958 during recent fluctuations in the slow growth of global tropospheric methane. *Geophys. Res. Lett.* **33**  
959 (2006).

960 93 Meirink, J. F., Bergamaschi, P. & Krol, M. C. Four-dimensional variational data assimilation  
961 for inverse modelling of atmospheric methane emissions: method and comparison with synthesis  
962 inversion. *Atmos Chem Phys* **8**, 6341-6353 (2008).

963 94 Bergamaschi, P. *et al.* Inverse modeling of European CH<sub>4</sub> emissions 2001-2006. *J. Geophys.*  
964 *Res.-atmos.* **115** (2010).

965 95 Krol, M. *et al.* The two-way nested global chemistry-transport zoom model TM5: algorithm  
966 and applications. *Atmos Chem Phys* **5**, 417-432 (2005).

967 96 Peylin, P. *et al.* Multiple constraints on regional CO<sub>2</sub> flux variations over land and oceans.  
968 *Global. Biogeochem. Cycles* **19**, - (2005).

969 97 Bousquet, P. *et al.* Regional changes in carbon dioxide fluxes of land and oceans since 1980.  
970 *Science* **290**, 1342-1346 (2000).

971 98 Bousquet, P., Hauglustaine, D. A., Peylin, P., Carouge, C. & Ciais, P. Two decades of OH  
972 variability as inferred by an inversion of atmospheric transport and chemistry of methyl chloroform.  
973 *Atmos Chem Phys* **5**, 2635-2656 (2005).

974 99 Bousquet, P. *et al.* A three-dimensional synthesis inversion of the molecular hydrogen cycle:  
975 Sources and sinks budget and implications for the soil uptake. *J. Geophys. Res.-atmos.* **116**, - (2011).

976 100 Gurney, K. R. *et al.* Transcom 3 inversion intercomparison: Model mean results for the  
977 estimation of seasonal carbon sources and sinks. *Global. Biogeochem. Cycles* **18**, GB2010,  
978 doi:10.1029/2003gb002111 (2004).

979 101 Uppala, S. M. *et al.* The ERA-40 Reanalysis. *J. Roy. Met. Soc.* **131**, 2961-3012 (2005).

980 102 Hourdin, F. & Talagrand, O. Eulerian backtracking of atmospheric tracers. I: Adjoint  
981 derivation and parametrization of subgrid-scale transport. *Quarterly Journal of the Royal*  
982 *Meteorological Society* **132**, 567-583 (2006).

983 103 Hourdin, F. D., Couvreux, F. & Menut, L. Parameterization of the dry convective boundary  
984 layer based on a mass flux representation of thermals. *J Atmos Sci* **59**, 1105-1123 (2002).

985 104 Matthews, E. & Fung, I. Methane emissions from natural wetlands, global distribution, area  
986 and environmental characteristics of sources. *Global. Biogeochem. Cycles* **1**, 61-86 (1987).

987 105 Olivier, J. G. J. & Berdowski, J. J. M. in *The Climate System*, (eds J. Berdowski, R. Guichert,  
988 & B. Heij) p. 33–78 (A.A. Balkema Publishers/Swets & Zeitlinger Publishers, 2001).

989 106 van der Werf, G. R. *et al.* Interannual variability in global biomass burning emissions from  
990 1997 to 2004. *Atmos Chem Phys* **6**, 3423-3441 (2006).

991 107 Peylin, P., Bousquet, P., Ciais, P. & Monfray, P. in *Inverse methods in global biogeochemical*  
992 *cycles, Geophysical Monograph 114* (eds P. Kashibata *et al.*) (American Geophysical Union,, 1999).

993 108 Peylin, P., Baker, D., Sarmiento, J., Ciais, P. & Bousquet, P. Influence of transport uncertainty  
994 on annual mean and seasonal inversions of atmospheric CO<sub>2</sub> data. *J. Geophys. Res.-atmos.* **107**, 4385,  
995 doi:4310.1029/2001JD000857 (2002).

996 109 Kaplan, J. O. Wetlands at the Last Glacial Maximum: Distribution and methane emissions.  
997 *Geophys. Res. Lett.* **29**, 1079, doi:10.1029/2001gl013366 (2002).

998 110 Bergamaschi, P. *et al.* Satellite cartography of atmospheric methane from SCIAMACHY on  
999 board ENVISAT: 2. Evaluation based on inverse model simulations. *J. Geophys. Res.-atmos.* **112**, -  
1000 (2007).

1001 111 Ridgwell, A. J., Marshall, S. J. & Gregson, K. Consumption of atmospheric methane by soils:  
1002 A process-based model. *Global Biogeochem. Cycles* **13**, 59-70, doi:10.1029/1998gb900004 (1999).

1003 112 Peters, W. *et al.* An ensemble data assimilation system to estimate CO<sub>2</sub> surface fluxes from  
1004 atmospheric trace gas observations. *J. Geophys. Res.-atmos.* **110**, D24304,  
1005 doi:24310.21029/22005JD006157 (2005).

1006 113 Fraser, A. *et al.* The Australian methane budget: Interpreting surface and train-borne  
1007 measurements using a chemistry transport model. *Journal of Geophysical Research: Atmospheres* **116**,  
1008 D20306, doi:10.1029/2011jd015964 (2011).

1009 114 Olivier, J. G. J., van Aardenne, J. A., Dentener, F., Ganzeveld, L. & Peters, J. A. H. W. in  
1010 *Non- CO2 Greenhouse Gases (NCGG- 4)*, . (ed A. van Amstel) pp. 325–330, (Millpress, Rotterdam).

1011 115 Bloom, A. A., Palmer, P. I., Fraser, A., Reay, D. S. & Frankenberg, C. Large-Scale Controls  
1012 of Methanogenesis Inferred from Methane and Gravity Spaceborne Data. *Science* **327**, 322-325,  
1013 doi:10.1126/science.1175176 (2010).

1014 116 Houweling, S., Kaminski, T., Dentener, F., Lelieveld, J. & Heimann, M. Inverse modeling of  
1015 methane sources and sinks using the adjoint of a global transport model. *J. Geophys. Res.-atmos.* **104**,  
1016 26137-26160 (1999).

1017 117 Fiore, A. *et al.* Variability in surface ozone background over the United States: Implications  
1018 for air quality policy. *J. Geophys. Res.* **108**, 4787, doi:10.1029/2003jd003855 (2003).

1019 118 Wang, J. S. *et al.* A 3-D model analysis of the slowdown and interannual variability in the  
1020 methane growth rate from 1988 to 1997. *Global. Biogeochem. Cycles* **18**, 3011,  
1021 doi:3010.1029/2003GB002180 (2004).

1022 119 Feng, L. *et al.* Evaluating a 3-D transport model of atmospheric CO2 using ground-based,  
1023 aircraft, and space-borne data. *Atmos. Chem. Phys.* **11**, 2789-2803, doi:10.5194/acp-11-2789-2011  
1024 (2011).

1025 120 Law, K. S. & Pyle, J. A. Modeling trace gas budgets in the troposphere: 1. Ozone and odd  
1026 nitrogen. *Journal of Geophysical Research: Atmospheres* **98**, 18377-18400, doi:10.1029/93jd01479  
1027 (1993).

1028 121 Chevallier, F. *et al.* Inferring CO2 sources and sinks from satellite observations: Method and  
1029 application to TOVS data. *J. Geophys. Res.-atmos.* **110**, doi:D24309  
1030 10.1029/2005jd006390 (2005).

1031 122 Pison, I., Bousquet, P., Chevallier, F., Szopa, S. & Hauglustaine, D. Multi-species inversion of  
1032 CH4, CO and H-2 emissions from surface measurements. *Atmos Chem Phys* **9**, 5281-5297 (2009).

1033 123 Fung, I. *et al.* Three-dimensional model synthesis of global methane cycle. *J. Geophys. Res.*  
1034 **96**, 13033-13065 (1991).

1035 124 Montzka, S. A. *et al.* New observational constraints for atmospheric hydroxyl on global and  
1036 hemispheric scales. *Science* **288**, 500-503 (2000).

1037 125 Gilbert, J.-C. & Lemaréchal, C. Some numerical experiments with variable-storage quasi-  
1038 Newton algorithms. *Mathematical programming* **45**, 407–435. (1989).

1039 126 Sitch, S. *et al.* Evaluation of ecosystem dynamics, plant geography and terrestrial carbon  
1040 cycling in the LPJ dynamic global vegetation model. *Glob Change Biol* **9**, 161-185 (2003).

1041 127 Gerten, D., Schaphoff, S., Haberlandt, U., Lucht, W. & Sitch, S. Terrestrial vegetation and  
1042 water balance—hydrological evaluation of a dynamic global vegetation model. *Journal of Hydrology*  
1043 **286**, 249-270, doi:10.1016/j.jhydrol.2003.09.029 (2004).

1044 128 Zobler, L. A world soil file for global climate modelling. 32 pages. (NASA/GISS, New York  
1045 USA, 1986).

1046 129 Krinner, G. *et al.* A dynamic global vegetation model for studies of the coupled atmosphere-  
1047 biosphere system. *Global. Biogeochem. Cycles* **19**, - (2005).

1048 130 Ringeval, B. *et al.* An attempt to quantify the impact of changes in wetland extent on methane  
1049 emissions on the seasonal and interannual time scales. *Global. Biogeochem. Cycles* **24**, doi:Gb2003  
1050 10.1029/2008gb003354 (2010).

1051 131 Ringeval, B. *et al.* Modelling sub-grid wetland in the ORCHIDEE global land surface model:  
1052 evaluation against river discharges and remotely sensed data. *Geosci. Model Dev.* **5**, 941-962,  
1053 doi:10.5194/gmd-5-941-2012 (2012).

1054 132 Walter, B. P., Heimann, M. & Matthews, E. Modeling modern methane emissions from  
1055 natural wetlands 2. Interannual variations 1982-1993. *J. Geophys. Res.-atmos.* **106**, 34207-34219  
1056 (2001).

1057 133 Papa, F. *et al.* Interannual variability of surface water extent at the global scale,  
1058 1993&#8211;2004. *J. Geophys. Res.* **115**, D12111, doi:10.1029/2009jd012674 (2010).

1059 134 Viovy, N. & Ciais, P. Vol. <http://dods.extra.cea.fr/data/p529viov/cruncep/readme.htm>  
1060 (2009).

1061 135 Prigent, C., Papa, F., Aires, F., Rossow, W. B. & Matthews, E. Global inundation dynamics  
1062 inferred from multiple satellite observations, 1993-2000. *J. Geophys. Res.-atmos.* **112**, -,  
1063 doi:doi:10.1029/2006JD007847 (2007).

1064 136 Leff, B., Ramankutty, N. & Foley, J. A. Geographic distribution of major crops across the  
1065 world. *Global Biogeochem. Cycles* **18**, GB1009, doi:10.1029/2003gb002108 (2004).

1066 137 Dentener, F. *et al.* The impact of air pollutant and methane emission controls on tropospheric  
1067 ozone and radiative forcing: CTM calculations for the period 1990-2030. *Atmos Chem Phys* **5**, 1731-  
1068 1755 (2005).

1069 138 EPA. Global Anthropogenic Non-CO2 Greenhouse Gas Emissions: 1990 - 2030. (U.S.  
1070 Environmental Protection Agency, Washington, DC 20460, 2011).

1071 139 Environmental Protection Agency report: Methane and Nitrous Oxide Emissions From  
1072 Natural Sources. [http://www.epa.gov/methane/pdfs/Methane-and-Nitrous-Oxide-Emissions-From-](http://www.epa.gov/methane/pdfs/Methane-and-Nitrous-Oxide-Emissions-From-Natural-Sources.pdf)  
1073 [Natural-Sources.pdf](http://www.epa.gov/methane/pdfs/Methane-and-Nitrous-Oxide-Emissions-From-Natural-Sources.pdf), U.S. Environmental Protection Agency, Washington, DC 20460 (2010).

1074 140 European Commission, Joint Research Centre (JRC)/Netherlands Environmental Assessment  
1075 Agency (PBL). Emission Database for Global Atmospheric Research (EDGAR), release version 4.2.  
1076 <http://edgar.jrc.ec.europa.eu>, 2011.

- 1077 141 Lamarque, J. F. *et al.* The Atmospheric Chemistry and Climate Model Intercomparison Project  
1078 (ACCMIP): overview and description of models, simulations and climate diagnostics. *Geosci. Model*  
1079 *Dev.* **6**, 179-206, doi:10.5194/gmd-6-179-2013 (2013).
- 1080 142 Voulgarakis, A. *et al.* Analysis of present day and future OH and methane lifetime in the  
1081 ACCMIP simulations. *Atmos. Chem. Phys.* **13**, 2563-2587, doi:10.5194/acp-13-2563-2013 (2013).
- 1082 143 Lamarque, J. F. *et al.* The Atmospheric Chemistry and Climate Model Intercomparison Project  
1083 (ACCMIP): overview and description of models, simulations and climate diagnostics. *Geosci. Model*  
1084 *Dev.* **6**, 179-206, doi:10.5194/gmd-6-179-2013 (2013).
- 1085 144 Lamarque, J. F. *et al.* Historical (1850–2000) gridded anthropogenic and biomass burning  
1086 emissions of reactive gases and aerosols: methodology and application. *Atmos. Chem. Phys.* **10**, 7017-  
1087 7039, doi:10.5194/acp-10-7017-2010 (2010).
- 1088 145 Donner, L. J. & al., e. The Dynamical Core, Physical Parameterizations, and Basic Simulation  
1089 Characteristics of the Atmospheric Component AM3 of the GFDL Global Coupled Model CM3. . *J.*  
1090 *Climate* **24**, 3484–3519, doi:doi: <http://dx.doi.org/10.1175/2011JCLI3955.1> (2011).
- 1091 146 Wild, O., Zhu, X. & Prather, M. J. Fast-J: Accurate simulation of in- and below-cloud  
1092 photolysis in tropospheric chemical models. *J. Atmos. Chem.*, **37**, 245-282 (2000).
- 1093 147 Cionni, I. *et al.* Ozone database in support of CMIP5 simulations: results and corresponding  
1094 radiative forcing. *Atmos. Chem. Phys.* **11**, 11267-11292, doi:10.5194/acp-11-11267-2011 (2011).
- 1095 148 Li, D. & Shine, K. P. A 4-Dimensional Ozone Climatology for UGAMP Models, . (1995).
- 1096 149 Dentener, F., van Weele, M., Krol, M., Houweling, S. & van Velthoven, P. Trends and inter-  
1097 annual variability of methane emissions derived from 1979-1993 global CTM simulations. *Atmos*  
1098 *Chem Phys* **3**, 73-88 (2003).
- 1099 150 Huijnen, V. *et al.* The global chemistry transport model TM5: description and evaluation of  
1100 the tropospheric chemistry version 3.0. *Geosci. Model Dev.* **3**, 445-473, doi:10.5194/gmd-3-445-2010  
1101 (2010).
- 1102 151 Williams, J. E., Strunk, A., Huijnen, V. & van Weele, M. The application of the Modified  
1103 Band Approach for the calculation of on-line photodissociation rate constants in TM5: implications for  
1104 oxidative capacity. *Geosci. Model Dev.* **5**, 15-35, doi:10.5194/gmd-5-15-2012 (2012).
- 1105 152 Naik, V. *et al.* Preindustrial to present-day changes in tropospheric hydroxyl radical and  
1106 methane lifetime from the Atmospheric Chemistry and Climate Model Intercomparison Project  
1107 (ACCMIP). *Atmos. Chem. Phys.* **13**, 5277-5298, doi:10.5194/acp-13-5277-2013 (2013).

1108
